# Supplementary material for: Management and early outcomes of children with appendicitis in the UK and Ireland during the COVID-19 pandemic: a survey of surgeons and observational study
Source: PubMed Central journal article supplement — BMJ Paediatr Open. 2020 Oct 22;4(1):e000831. doi: 10.1136/bmjpo-2020-000831 (PMC7582338; doi:10.1136/bmjpo-2020-000831), 2020-10-22
Supplement: bmjpo-2020-000831.draft_revisions.pdf [file bmjpo-2020-000831.draft_revisions.pdf]

# BMJ Paediatrics Open

BMJ Paediatrics Open is committed to open peer review. As part of this commitment we make the peer review history of every article we publish publicly available.

When an article is published we post the peer reviewers' comments and the authors' responses online. We also post the versions of the paper that were used during peer review. These are the versions that the peer review comments apply to.

The versions of the paper that follow are the versions that were submitted during the peer review process. They are not the versions of record or the final published versions. They should not be cited or distributed as the published version of this manuscript.

BMJ Paediatrics Open is an open access journal and the full, final, typeset and author-corrected version of record of the manuscript is available on our site with no access controls, subscription charges or pay-per-view fees (<http://bmjpaedsopen.bmj.com>).

If you have any questions on BMJ Paediatrics Open's open peer review process please email [info.bmjpo@bmj.com](mailto:info.bmjpo@bmj.com)

# BMJ Paediatrics Open

## Impact of the COVID-19 pandemic on management and early outcomes of children with appendicitis

|                               |                                                                                                                                                                                                                                                                          |
|-------------------------------|--------------------------------------------------------------------------------------------------------------------------------------------------------------------------------------------------------------------------------------------------------------------------|
| Journal:                      | <i>BMJ Paediatrics Open</i>                                                                                                                                                                                                                                              |
| Manuscript ID                 | bmjpo-2020-000831                                                                                                                                                                                                                                                        |
| Article Type:                 | Original research                                                                                                                                                                                                                                                        |
| Date Submitted by the Author: | 12-Aug-2020                                                                                                                                                                                                                                                              |
| Complete List of Authors:     | Bethell, George; University of Southampton Faculty of Medicine, University Surgical Unit<br>Rees, Clare; Imperial College Healthcare NHS Trust<br>Sutcliffe, Jonathan; Leeds Teaching Hospitals NHS Trust<br>Hall, Nigel; University of Southampton, Faculty of Medicine |
| Keywords:                     | Gastroenterology                                                                                                                                                                                                                                                         |
|                               |                                                                                                                                                                                                                                                                          |

SCHOLARONE™  
Manuscripts

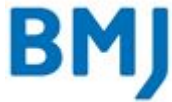

I, the Submitting Author has the right to grant and does grant on behalf of all authors of the Work (as defined in the below author licence), an exclusive licence and/or a non-exclusive licence for contributions from authors who are: i) UK Crown employees; ii) where BMJ has agreed a CC-BY licence shall apply, and/or iii) in accordance with the terms applicable for US Federal Government officers or employees acting as part of their official duties; on a worldwide, perpetual, irrevocable, royalty-free basis to BMJ Publishing Group Ltd ("BMJ") its licensees and where the relevant Journal is co-owned by BMJ to the co-owners of the Journal, to publish the Work in this journal and any other BMJ products and to exploit all rights, as set out in our [licence](#).

The Submitting Author accepts and understands that any supply made under these terms is made by BMJ to the Submitting Author unless you are acting as an employee on behalf of your employer or a postgraduate student of an affiliated institution which is paying any applicable article publishing charge ("APC") for Open Access articles. Where the Submitting Author wishes to make the Work available on an Open Access basis (and intends to pay the relevant APC), the terms of reuse of such Open Access shall be governed by a Creative Commons licence – details of these licences and which [Creative Commons](#) licence will apply to this Work are set out in our licence referred to above.

Other than as permitted in any relevant BMJ Author's Self Archiving Policies, I confirm this Work has not been accepted for publication elsewhere, is not being considered for publication elsewhere and does not duplicate material already published. I confirm all authors consent to publication of this Work and authorise the granting of this licence.

# Impact of the COVID-19 pandemic on management and early outcomes of children with appendicitis

## *CASCADE study collaborators*

Members of the CASCADE study collaborators group are listed in the Acknowledgement section.

The Corresponding Author has the right to grant on behalf of all authors and does grant on behalf of all authors, an exclusive licence (or non exclusive for government employees) on a worldwide basis to the BMJ Publishing Group Ltd to permit this article (if accepted) to be published in BMJ editions and any other BMJ PGL products and sublicences such use and exploit all subsidiary rights, as set out in our licence."

All authors have completed the Unified Competing Interest form (available on request from the corresponding author) and declare: no support from any organisation for the submitted work; no financial relationships with any organisations that might have an interest in the submitted work in the previous three years, no other relationships or activities that could appear to have influenced the submitted work.

Data sharing statement – Reasonable requests of relevant data will be considered.

### **Corresponding author and guarantor:**

Nigel J Hall  
University Surgical Unit  
Faculty of Medicine  
University of Southampton  
Tremona Road  
Southampton  
SO16 6YD  
[n.j.hall@soton.ac.uk](mailto:n.j.hall@soton.ac.uk)  
023 8120 6146

1  
2  
3  
4  
5  
6  
7  
8  
9  
10  
11  
12  
13  
14  
15  
16  
17  
18  
19  
20  
21  
22  
23  
24  
25  
26  
27  
28  
29  
30  
31  
32  
33  
34  
35  
36  
37  
38  
39  
40  
41  
42  
43  
44  
45  
46  
47  
48  
49  
50  
51  
52  
53  
54  
55  
56  
57  
58  
59  
60

Confidential: For Review Only

## Abstract

### **Objectives**

Acute appendicitis is the most common surgical condition in children and is traditionally treated with appendicectomy. Due to concerns about the risk of SARS-CoV-2 transmission during surgical procedures, surgeons were advised to consider non-operative treatment and avoid laparoscopy where possible. This study aims to report the impact to date of the COVID-19 pandemic on the management and outcomes of children with appendicitis in the United Kingdom and Ireland.

### **Design**

Survey of consultant surgeons who treat children with appendicitis that informed a prospective multicentre observational cohort study.

### **Setting**

Data were collected from centres in the United Kingdom and Ireland for cases admitted between April 1st and May 31<sup>st</sup> 2020 (first 2 months of the COVID-19 pandemic) at both general surgical and specialist paediatric surgical centres.

### **Participants**

The study cohort includes 838 children with a clinical and/or radiological diagnosis of acute appendicitis of which 527 (63%) were male.

### **Main outcomes measured**

Primary outcome was treatment strategy used for acute appendicitis. Other outcomes reported include change in treatment strategy over time, use of diagnostic imaging and important patient outcomes to 30 days following hospital admission.

### **Results**

From very early in the pandemic surgeons experienced a change in their management of children with appendicitis and almost all surgeons who responded to the survey anticipated further changes during the pandemic. Overall 326/838 (39%) were initially treated non-operatively of whom 81/326 (25%) proceeded to appendicectomy within the initial hospital admission. Of cases treated surgically 243/512 (48%) were performed laparoscopically. Diagnostic imaging was used in 445/838 (53%) children. Cases treated non-operatively had a shorter hospital stay than those treated surgically but

1  
2  
3 hospital readmissions within 30 days were similar between groups. In cases treated surgically the  
4 negative appendicectomy rate was 4.5%.

### 7 **Conclusion**

8  
9 COVID-19 has had a significant impact on the treatment of children with appendicitis in the UK and  
10 Ireland. Non-operative treatment has been widely used for the first time in children and is safe and  
11 effective. Overall patient outcomes do not appear to have been adversely impacted by change in  
12 management during the pandemic thus far.  
13  
14  
15  
16  
17  
18  
19

## 20 **What is known about the subject**

- 21
- 22
- 23 • Acute appendicitis is a common condition in children and in the UK is typically treated with  
24 appendicectomy
- 25
- 26 • The SARS-CoV-2 pandemic has caused widespread disruption to healthcare delivery and  
27 surgeons were advised to alter their usual practice due to possible viral transmission during  
28 surgery
- 29
- 30 • How the pandemic would impact on the management and outcomes of children with  
31 appendicitis was unclear  
32  
33  
34  
35

## 36 **What this study adds**

- 37
- 38
- 39 • Nearly 40% of all cases of appendicitis were managed non-operatively and there was much  
40 greater use of open appendicectomy than before the pandemic
- 41
- 42 • Non-operative treatment appears a safe alternative to surgery for selected cases in this real  
43 world setting and overall treatment outcomes are satisfactory
- 44
- 45 • These data are helpful for informing ongoing management during the pandemic, when there  
46 may continue to be restrictions on surgical care, and during and second wave.  
47  
48  
49  
50  
51  
52  
53  
54  
55  
56  
57  
58  
59  
60

## Introduction

Acute appendicitis is the most common surgical condition in children and affects approximately 8% of all people throughout their lifetime. In the United Kingdom (UK) treatment of children with appendicitis is shared between general surgeons in district general hospitals and specialist paediatric surgeons at specialist paediatric centres(1) but typically treatment is surgical with the majority of cases undergoing urgent appendicectomy. Non-operative treatment of acute appendicitis in children is not widespread in the UK and is reserved typically for highly selected cases or as part of a research study.(2)

The SARS-CoV-2 (COVID-19) pandemic has caused widespread disruption to hospitals worldwide. The disruption to the delivery of acute surgical services was anticipated to impact how children with appendicitis were managed for a wide variety of reasons including staff redeployment, operating theatre availability and concerns about transmission of SARS-CoV-2 from patients to healthcare staff during anaesthesia and surgical procedures, particularly during laparoscopic procedures.(3) Early guidance from the Royal College of Surgeons England suggested that laparoscopy should only be used in procedures where the risk of an open procedure to the patient outweighed the potential risk to staff in theatre as laparoscopy was believed to be an aerosol generating procedure (AGP).(3) It was also recommended that non-operative treatment should be used to avoid surgery for all conditions, including appendicitis, if it was considered an acceptable alternative treatment option.(4) In addition it has been shown that exposing a patient with COVID-19 to a surgical procedure has a significant adverse impact on outcome.(5) This may also have influenced surgeons towards greater use of non-operative treatment for children with appendicitis, although data emerged through the first months of the pandemic that children are much less likely to become infected with COVID-19 than adults and the impact of COVID-19 on outcomes following surgery in children is less clear.(6)

The CASCADE study (Children with Appendicitis during the CoronAvirus panDEmic) was initiated in late March 2020 to capture data relating to the impact of this disruption on the management and outcomes of children with appendicitis during the pandemic. The study comprised a rapid survey of surgeons in the UK who treat children to understand the current or anticipated impact of the pandemic on management of children with appendicitis followed by an observational cohort study. This report details the findings of the survey and the impact on management seen during the first 2 months of the pandemic in the UK and early (30 day) outcomes. It is provided to assist surgeons with clinical decision making throughout the pandemic and in the event that there is a second wave resulting in further disruption to acute surgical services.



## Methods

### Survey of surgeons who treat children

A survey was designed to understand the impact of the pandemic on treatment being offered to children with acute appendicitis at the start of the pandemic. Questions were developed, piloted on a convenience sample of surgeons and modified prior to survey distribution. The survey was approved by the research committee of the British Association of Paediatric Surgeons. Specialist paediatric and general surgeons who treat children with appendicitis were invited to complete the survey during the 2-week period leading up to April 14<sup>th</sup> 2020. Invitations were made via personal contacts, social media and mailshots from the British Association of Paediatric Surgeons. The survey was administered online using REDCap data capture tool (7) and is available in supplementary material S1. Questions asked were focussed around understanding the impact of the COVID-19 pandemic on the management of children with appendicitis experienced to date, the anticipated impact over the coming weeks and the rationale behind any change in management.

### Cohort study design

This is a prospective multicentre observational cohort study of children aged less than 16 years at time of hospital admission diagnosed with and treated for acute appendicitis in the UK and Ireland. This includes children treated by general surgeons and specialist paediatric surgeons. Participating hospitals were not required to alter diagnostic or treatment pathways and no changes were made to patient care as part of this study. Data collection for the study commenced April 1<sup>st</sup> 2020.

### Centre recruitment and patient identification

Hospitals providing acute surgical care to children were invited to participate in this study via a number of channels including targeted emails, newsletters, social media and websites of surgical and paediatric national organisations including the British Association of Paediatric Surgeons, the Royal College of Surgeons of England, and the Royal College of Paediatrics and Child Health. Children were included in the study if they were diagnosed with and treated for acute appendicitis in hospital. Diagnosis was based on clinical and/or radiological criteria. Children who presented with abdominal pain but not felt to have appendicitis were excluded. This report includes all children in the study dataset with an initial admission date between April 1<sup>st</sup> 2020 and May 31<sup>st</sup> 2020 and for whom 30-day

1  
2  
3 outcome data was provided to the coordinating team by the data cut-off date of 13<sup>th</sup> July 2020. Follow-  
4 up data was censored at 30 days post hospital discharge from initial admission.  
5  
6

## 7 Ethical considerations

8  
9  
10 This study was registered at each site as a service evaluation, as defined by the health research  
11 authority guidance, as this was an observational study only collecting anonymised routine data with  
12 no change to clinical care pathways.  
13  
14

## 15 Outcomes

16  
17  
18 The primary outcome was the initial treatment strategy for acute appendicitis, defined as surgical or  
19 non-operative. Secondary outcomes related to patient management included number and proportion  
20 of operative cases performed open and laparoscopically, use of diagnostic imaging and variation in  
21 patient management over time, as the pandemic progressed. Other clinical outcomes were success  
22 rate of non-operative treatment (defined as appendicectomy within initial hospital inpatient episode  
23 in a case in whom the initial treatment strategy was non-operative), need for hospital readmission,  
24 wound infection, bowel obstruction, intra-abdominal collection, further surgery, length of hospital  
25 stay and mortality. These outcomes were all reported to 30 days following initial hospital admission  
26 and were selected as important outcomes from a core outcome set for paediatric appendicitis.(8)  
27  
28  
29  
30  
31  
32  
33

## 34 Data collection and analysis

35  
36  
37 Anonymous data were collected by local study teams within each hospital and submitted to the study  
38 team monthly. Data were checked for duplication since we were aware that some cases were  
39 transferred from one hospital to another during the study period (typically from a district general  
40 hospital to a local specialist paediatric surgery centre) and we wished to avoid duplication. Duplicated  
41 data records were identified and excluded if all of age, sex, CRP and WCC at admission were identical.  
42  
43  
44

45  
46 Statistical analysis was performed using StataSE v15 (StataCorp LLC, Texas, USA) and the figures were  
47 produced using GraphPad Prism v8 (GraphPad Software, La Jolla California USA). Data are presented  
48 as median (IQR or range) and/or number/total (%) as appropriate. Fisher's exact test or chi-squared  
49 test, as appropriate, were used for comparison of categorical data and the Mann Whitney-U test was  
50 used for non-parametric continuous data. A chi-squared test for trend was used to compare changes  
51 in management over time. A *p* value of less than 0.05 was considered as statistically significant. The  
52 study was conducted according to Strengthening the Reporting of Observational studies in  
53 Epidemiology (STROBE) guidelines for observational studies.(9)  
54  
55  
56  
57  
58  
59  
60

## Patient and public involvement

Patients, parents and the public were fully involved in a recent pilot study of non-operative treatment for appendicitis carried out by our research group(2) however given the restrictions and need for rapid study commencement there was no active patient and public involvement in this study at this stage. There is no relevant patient group of to disseminate findings of this study to.

## Funding

The study did not receive any funding. The corresponding author had full access to all study data and responsibility for publication.

## Results

### Survey of surgeons who treat children

One hundred and one complete responses (75% specialist paediatric surgeons, 25% general surgeons) were received from surgeons at 19 district general hospitals and 26 specialist children's centres. One fifth of respondents (representing 60% of hospitals) had already experienced some change in their usual clinical management of children with appendicitis. The most frequent changes experienced were the use of non-operative treatment for uncomplicated acute appendicitis (63%), open (instead of laparoscopic) appendicectomy for complicated appendicitis (37%), more frequent use of imaging to confirm diagnosis and greater use of oral rather than intravenous antibiotics (both 32%). In the majority of cases (95%) this change was an active individual surgeon or departmental decision.

Most respondents (87%) indicated they anticipated some change in the management pathway for these children, either in their diagnostic work-up, the type of treatment offered or that they would cease treating children with appendicitis altogether during the coronavirus pandemic (Table 1).

**Table 1: Anticipated future effect on management of children with appendicitis during coronavirus pandemic**

| Anticipated change                                                                                          | GS<br>(n=21) | SPS<br>(n=65) |
|-------------------------------------------------------------------------------------------------------------|--------------|---------------|
| Simple appendicitis: I will actively offer non-operative treatment to all children with simple appendicitis | 15           | 45            |

|                                           |                                                                                                                                                          |    |    |
|-------------------------------------------|----------------------------------------------------------------------------------------------------------------------------------------------------------|----|----|
| 1<br>2<br>3<br>4<br>5<br>6<br>7<br>8<br>9 | Simple appendicitis: I will consider non-operative treatment for children with simple appendicitis at parental request                                   | 5  | 14 |
| 10<br>11<br>12<br>13<br>14<br>15<br>16    | Simple appendicitis: I will actively perform open (as opposed to laparoscopic) appendicectomy in children with simple appendicitis                       | 4  | 32 |
| 17<br>18<br>19<br>20<br>21<br>22<br>23    | Complicated appendicitis: I will actively offer non-operative treatment to children with complicated appendicitis                                        | 3  | 10 |
| 24<br>25<br>26<br>27<br>28                | Complicated appendicitis: I will consider non-operative treatment to children with complicated appendicitis at parental request                          | 6  | 11 |
| 29<br>30<br>31<br>32<br>33                | Complicated appendicitis: I will actively perform open (as opposed to laparoscopic) appendicectomy in children with complicated appendicitis             | 12 | 44 |
| 34<br>35<br>36<br>37<br>38                | Complicated appendicitis: I will actively pursue a shorter than usual course of intravenous antibiotics in children with complicated appendicitis        | 5  | 9  |
| 39<br>40<br>41<br>42<br>43                | Appendix mass: I will actively offer non-operative treatment to children with appendix mass                                                              | 12 | 26 |
| 44<br>45<br>46<br>47                      | Appendix mass: I will consider non-operative treatment to children with appendix mass at parental request                                                | 4  | 6  |
| 48<br>49<br>50<br>51                      | Appendix mass: I will not offer routine interval appendicectomy in children who have has successful non-operative treatment of appendix mass             | 3  | 17 |
| 52<br>53<br>54<br>55                      | Any appendicitis: Routine imaging for all cases of suspected appendicitis to be certain of diagnosis                                                     | 6  | 14 |
| 56<br>57<br>58<br>59                      | Any appendicitis: CT scan instead of US for diagnosis of appendicitis                                                                                    | 0  | 0  |
| 60<br>61<br>62<br>63                      | Any appendicitis: More frequent use of imaging to guide management (e.g. select cases for non-operative treatment / reduce negative appendicectomy rate) | 13 | 31 |
| 64<br>65<br>66<br>67                      | Any appendicitis: consultant review for all cases prior to considering surgery                                                                           | 15 | 46 |
| 68<br>69<br>70<br>71                      | Any appendicitis: we will likely be sending children with appendicitis to another hospital for treatment                                                 | 3  | 1  |
| 72<br>73<br>74<br>75                      | Any appendicitis: we will likely be treating children at my hospital who would usually be treated somewhere else                                         | 0  | 33 |

GS – general surgeons, SPS – specialist paediatric surgeons

### Observational cohort study - children included and radiological investigations

Data were submitted prior to the data cut-off date for this report for 838 children treated for appendicitis between April 1<sup>st</sup> and May 31<sup>st</sup> 2020 in 67 centres. All are included. The median age was 10 (range 1-15) years and 527 (62.8%) children were male. General surgeons treated 343 (40.9%) of cases with the remaining 496 (59.1%) being treated by specialist paediatric surgeons. In this cohort of

1  
2  
3 children treated for appendicitis, diagnostic imaging was used in 445 (53.1%) children with abdominal  
4 ultrasound and abdominal computed tomography (CT) scan undertaken in 420 (50.1%) and 46 (5.5%)  
5 cases respectively. At the point of diagnosis 600 children (72%) were suspected by the treating  
6 surgeon to have simple acute appendicitis, 201 (24%) complicated appendicitis and 35 (4%) an  
7 appendix mass (data missing in 3 cases).  
8  
9

10  
11  
12 At diagnosis of acute appendicitis the COVID-19 status was known positive in 4 (0.5%) children, known  
13 negative in 171 (20.4%) children, tested awaiting result in 397 (47%) children and 266 (32%) children  
14 were untested.  
15  
16

### 17 18 Initial treatment strategy

19  
20 Initial treatment strategy was non-operative in 326 (38.9%) children. In the 512 (61.1%) of children  
21 treated initially with surgery, 262 (51.9%) had an open procedure and 243 (48.1%) an initially  
22 laparoscopic procedure (data not available for 7 cases). Of 600 cases suspected to be simple  
23 appendicitis at the point of diagnosis 44% (n=259) were treated non-operatively, 31% (n=182) with  
24 open appendicectomy and 26% (n=155) with laparoscopic appendicectomy (data missing in 4 cases).  
25  
26 Of 201 cases suspected to be complicated appendicitis at the point of diagnosis 20% (n=40) were  
27 treated non-operatively, 38% (n=76) with open appendicectomy and 42% (n=84) with laparoscopic  
28 appendicectomy (data missing in 1 case). Of 35 cases suspected to be an appendix mass at the point  
29 of diagnosis 76% (n=25) were treated non-operatively, 12% (n=4) with open appendicectomy and 12%  
30 (n=4) with laparoscopic appendicectomy (data missing in 2 cases).  
31  
32

33  
34 Comparative clinical, laboratory and radiological details for cases treated surgically and non-  
35 operatively are shown in Table 2. Cases treated surgically typically had more advanced appendicitis  
36 with higher CRP and white cell count at diagnosis and were more likely to have suspected complicated  
37 (as opposed to simple) appendicitis. A higher proportion of cases treated non-operatively had an  
38 ultrasound scan than of cases treated surgically. Of cases suspected to be simple appendicitis 43%  
39 (259/600) were initially treated non-operatively compared to 20% (40/201) of cases suspected to be  
40 complicated appendicitis.  
41  
42

43  
44 For cases treated surgically with either open or laparoscopic appendicectomy, comparative clinical,  
45 laboratory and radiological details for are shown in Table 3. Overall 48.1% (n=243) of cases that were  
46 treated surgically underwent a laparoscopic procedure. There was no relationship identified between  
47 choice of procedure and suspected severity of appendicitis pre-operatively. Cases treated  
48 laparoscopically were older, more likely to be treated by a specialist paediatric surgeon and more likely  
49 to have had a diagnostic ultrasound than cases performed open. For both open and laparoscopic  
50  
51  
52  
53  
54  
55  
56  
57  
58  
59  
60

procedures surgeons tended to underestimate disease severity at diagnosis compared to the surgical findings (Table 3). The overall negative appendicectomy rate was 4.5% (n=23) in cases treated surgically.

## Change in initial treatment method during the pandemic

During the first week of April 2020 the proportion of cases initially treated non-operatively was 49% which reduced to 33% in the last week of May 2020, (Figure 1). Of those cases treated operatively, 79% were by open appendicectomy during the first week of April 2020 and this reduced to 41% in the last week of May 2020 (Figure 2).

## Figures

**Figure 1.** Initial management strategy of appendicitis by week, operative vs non-operative. The red bars represent operative treatment and the blue bars represent non-operative treatment. Chi-squared for trend – p=0.0045.

**Figure 2.** Initial operative management strategy of appendicitis by week, open vs laparoscopic. The red bars represent laparoscopic appendicectomy and the blue bars represent open appendicectomy. Chi-squared for trend – p<0.0001.

Table 2 Clinical, laboratory and radiological characteristics of cases treated initially non-operatively or operatively

|                              |                           | Non-operative (n=326) | Operative (n=512) | p       |
|------------------------------|---------------------------|-----------------------|-------------------|---------|
| Age (years)                  |                           | 10.5 (8-13)           | 10 (8-12)         | 0.19    |
| Male (n, %)                  |                           | 195 (59.8)            | 331 (64.7)        | 0.16    |
| Duration of symptoms (hours) |                           | 36 (24-72)            | 48 (24-72)        | 0.58    |
| Speciality (n, %)            | GS                        | 140 (42.9)            | 202 (39.5)        | 0.35    |
|                              | SPS                       | 186 (57.1)            | 310 (60.6)        |         |
| Admission bloods             | WCC – x10 <sup>9</sup> /L | 14.4 (10.7-17.8)      | 15.2 (12.0-18.5)  | 0.01    |
|                              | CRP - mg/L                | 32 (7.1-81)           | 52 (15-126)       | <0.0001 |
| US performed (n, %)          |                           | 193 (60.1)            | 227 (44.3)        | <0.0001 |
| CT performed (n, %)          |                           | 16 (5.7)              | 30 (6.3)          | 0.76    |

| Suspected severity at diagnosis (n, %) | Simple        | 259 (79.9) | 341 (66.6) | <0.0001 |
|----------------------------------------|---------------|------------|------------|---------|
|                                        | Complicated   | 40 (12)    | 161 (31.5) |         |
|                                        | Appendix mass | 25 (7.7)   | 10 (2.0)   |         |
|                                        |               |            |            |         |

GS – general surgeon; SPS – specialist paediatric surgeon; WCC – white cell count; CRP – C-reactive protein; L – litre; mg – milligrams.

### Patient outcomes to 30-days

For 326 cases treated non-operatively, 81 (25%) children failed non-operative treatment during the initial admission and proceeded to appendicectomy. This was approached via an open procedure in 35 (44%) cases and a laparoscopic procedure in 45 (56%) cases (data missing in 1 case). Where available (missing n=3), intra-operative findings in those who failed initial non-operative treatment were normal appendix in 4 (5%) children, simple appendicitis in 37 (47%) children, complicated appendicitis in 32 (41%) children and appendix mass in 6 (8%) children.

Overall, cases treated operatively had a longer length of initial inpatient stay compared to those treated initially non-operatively (3 [2-5] vs 2 [1-4] days,  $p<0.0001$ ). Overall the 30-day readmission rate was 12% (30/245) for non-operative treatment in those that were discharged home without an operation and 7% (38/512) in those treated initially with an operation. Reasons for readmission in cases treated operatively were abdominal collection/abscess (n=17), abdominal pain (n=11), fever (n=2), wound dehiscence/infection (n=6) and small bowel obstruction (n=1). Reasons for readmission in the group which underwent non-operative treatment without appendicectomy prior to discharge were abdominal collection/abscess (n=4), abdominal pain (n=20) and fever (n=4). Note that in some cases there were multiple reasons for readmission or the reason was not specified.

At 30-days there were no reported deaths. Children undergoing an open procedure had a similar rate of readmission (7 [n=19] vs 8% [n=19],  $p=0.87$ ), wound infection (4 [n=10] vs 2% [n=4],  $p=0.18$ ), bowel obstruction (1 [n=2] vs 1% [n=3],  $p=0.68$ ), intra-abdominal collection (8 [n=21] vs 10% [n=25],  $p=0.44$ ) and re-operation (3 [n=8] vs 5% [n=13],  $p=0.27$ ) to those who had a laparoscopic procedure. An open procedure was associated with a shorter length of inpatient stay compared to a laparoscopic procedure (2 [2-4] vs 3 [2-6],  $p=0.005$ ). These outcomes are further stratified by severity of appendicitis in Table 4.



Table 3 Clinical, laboratory and radiological characteristics of cases treated initially operatively stratified by open or laparoscopic procedure

|                                          |                           | Open<br>(n=262)  | Laparoscopic<br>(n=243) | p      |
|------------------------------------------|---------------------------|------------------|-------------------------|--------|
| Age (years)                              |                           | 10 (7-12)        | 11 (9-13)               | 0.0004 |
| Male (n,%)                               |                           | 176 (67.2)       | 149 (61.3)              | 0.19   |
| Speciality (n,%)                         | GS                        | 119 (59.5)       | 81 (40.5)               | 0.006  |
|                                          | SPS                       | 143 (46.9)       | 162 (53.1)              |        |
| Admission bloods                         | WCC – x10 <sup>9</sup> /L | 15.6 (12.3-18.6) | 14.9 (11.6-18.0)        | 0.34   |
|                                          | CRP - mg/L                | 52 (15-130)      | 52 (15-124)             |        |
| US performed (n,%)                       |                           | 101 (38.6)       | 122 (50.2)              | 0.009  |
| CT performed (n,%)                       |                           | 18 (8.0)         | 12 (4.9)                | 0.19   |
| Suspected severity pre-operatively (n,%) | Simple                    | 182 (69.5)       | 155 (63.8)              | 0.40   |
|                                          | Complicated               | 76 (29)          | 84 (34.6)               |        |
|                                          | Appendix mass             | 4 (1.5)          | 4 (1.7)                 |        |
| Operative findings (n,%)                 | Normal                    | 13 (5.0)         | 10 (4.1)                | 0.66   |
|                                          | Mass                      | 7 (2.7)          | 8 (3.3)                 |        |
|                                          | Simple                    | 128 (49.0)       | 108 (44.4)              |        |
|                                          | Complicated               | 113 (43.3)       | 117 (48.2)              |        |

Data missing for 7 cases. GS – general surgeon; SPS – specialist paediatric surgeon; WCC – white cell count; CRP – C-reactive protein; L – litre; mg – milligrams.

Table 4 Comparative outcomes for cases treated initially operatively stratified by operative findings

| Table 4                | Simple or No appendicitis |                         |      | Complicated appendicitis or Appendix Mass |                         |      |
|------------------------|---------------------------|-------------------------|------|-------------------------------------------|-------------------------|------|
|                        | Open<br>(n=141)           | Laparoscopic<br>(n=118) | p    | Open<br>(n=120)                           | Laparoscopic<br>(n=125) | p    |
| Readmission (n, %)     | 4 (2.8)                   | 4 (3.4)                 | 1.00 | 15 (12.5)                                 | 15 (12.0)               | 1.00 |
| Wound infection (n, %) | 0 (0)                     | 2 (1.7)                 | 0.21 | 10 (8.3)                                  | 2 (1.6)                 | 0.02 |



|                                           |         |         |      |           |           |       |
|-------------------------------------------|---------|---------|------|-----------|-----------|-------|
| Bowel obstruction (n, %)                  | 0 (0)   | 0 (0)   | 1.00 | 2 (1.7)   | 3 (2.4)   | 1.00  |
| Intra-abdominal collection/abscess (n, %) | 4 (2.8) | 2 (1.7) | 0.69 | 17 (14.2) | 23 (18.4) | 0.39  |
| Reoperation (n, %)                        | 1 (0.7) | 0 (0)   | 1.00 | 7 (5.8)   | 13 (10.4) | 0.25  |
| Length of stay (days, median and IQR)     | 2 (1-3) | 2 (1-3) | 0.33 | 4 (2-6)   | 6 (4-8)   | 0.001 |

## Discussion

This report confirms anecdotal suspicion that the management of children with appendicitis has been significantly impacted during the coronavirus pandemic with a clear shift towards non-operative management and towards open appendicectomy in cases managed surgically. Although we do not present here any comparative data to a different time period, the use of non-operative treatment for children with acute appendicitis was extremely limited in a survey performed in 2018(2) and anecdotally we do not believe there has been a significant change in practice prior to the start of the pandemic. The fact that overall just under 40% of children with suspected appendicitis were treated initially non-operatively represents a huge change in practice. This change was seen from early in the pandemic as reported in our initial survey and was anticipated by the majority of survey respondents.

Interestingly over the course of this data collection period the proportion of cases undergoing non-operative management decreased and the proportion of cases treated surgically having a laparoscopic procedure increased over time. We suspect this pattern is a reflection of initial guidance from professional bodies proposing non-surgical treatments be sought wherever possible and cautioning against the use of laparoscopy.(4) Subsequent evolution of that guidance over time may have encouraged surgeons to resume their normal practice. We intend to monitor surgical practice longer term during the pandemic to identify any further changes in management.

The sudden widespread uptake of non-operative treatment of appendicitis seen to date during the pandemic presents an opportunity to evaluate non-operative treatment in a real world setting across multiple centres in a way that until recently would not have been imagined possible. These early data suggest that non-operative treatment of acute appendicitis is effective and safe in a real-world setting. Cases treated non-operatively achieved a shorter length of stay than cases treated surgically, there were no deaths and the adverse event profile of each treatment approach was similar. These data suggest that surgeons selected less severe cases for non-operative treatment despite no formal guidelines existing for this purpose. Yet it remains likely that non-operative treatment has been used

1  
2  
3 here outside the criteria used to date in formal research studies in which it has been evaluated.(10-  
4 12) Of note 12% of cases in which non-operative treatment was used as first line therapy were  
5 suspected to be complicated appendicitis.  
6  
7

8  
9 Both open and laparoscopic appendicectomy are recognised to be safe and effective treatments for  
10 children with appendicitis although there has been increased uptake of laparoscopic appendicectomy  
11 in children in the UK in recent years.(13) The reversal of this trend during the pandemic such that just  
12 48% of all cases treated surgically were performed laparoscopically is likely in response to guidance  
13 from professional bodies that laparoscopy may increase the risk of SARS-CoV-2 transmission in  
14 positive cases.(3) Anecdotally we are aware that a move away from laparoscopy has been  
15 implemented by some individual surgeons and also by some institutions. The trend towards a higher  
16 proportion of cases being performed laparoscopically over time (Figure 2) is consistent with updated  
17 guidance from professional bodies and a greater understanding about the epidemiology of COVID-19  
18 in children(6). It is also possible that there is an interaction between the decreasing use of non-  
19 operative treatment and increasing use of laparoscopy if some surgeons feel reluctant to perform  
20 open appendicectomy (i.e. there may be surgeons who have preferred non-operative treatment  
21 rather than open appendicectomy in cases they would usually treat laparoscopically).  
22  
23  
24  
25  
26  
27  
28  
29  
30

31 Recently the high negative appendicectomy rate observed in the UK has been highlighted and  
32 achieved significant public interest.(14, 15) It is therefore of particular note that the negative  
33 appendicectomy rate seen in this dataset is extremely low, and in fact one of the lowest rates reported  
34 in the UK to date(1, 14, 16). Alongside this, radiological imaging has been seen more frequently during  
35 the period of the pandemic than in a published national dataset (16). It is not clear whether increasing  
36 use of imaging has resulted in such a low negative appendicectomy rate but it is certainly a possibility.  
37 Other factors may also be contributory however, including increased use of non-operative treatment  
38 and potentially increased consultant involvement in decision making. Although we do not have data  
39 on consultant involvement in decision making on a case by case basis within this dataset, just over  
40 70% of consultants anticipated there would be greater consultant involvement in management of  
41 children with appendicitis in the survey undertaken at the beginning of the pandemic. This is certainly  
42 an area worthy of further investigation since a reduction in the negative appendicectomy rate may be  
43 seen as an unanticipated benefit that it would be beneficial to maintain in the longer term. The COVID-  
44 19 pandemic may inadvertently be presenting opportunities for quality improvement that should be  
45 realised beyond the period of the pandemic itself.  
46  
47  
48  
49  
50  
51  
52  
53  
54  
55

56  
57 The strengths of this study are that data have been collected prospectively from multiple centres from  
58 across the United Kingdom and Ireland. We deliberately did not involve other international centres so  
59  
60

1  
2  
3 as to achieve a region across which there is relative consistency in management of children with  
4 appendicitis. This early analysis has been performed following a change in surgical practice to inform  
5 ongoing management during the pandemic and in the event of a second wave. The findings are likely  
6 generalisable to other countries in whom management is similar to that in the United Kingdom and  
7 Ireland. As a pragmatic real world study it provides an overview of real life outcomes outside the  
8 confines that would typically be achieved in a clinical trial. Conversely some may view this pragmatism  
9 as a weakness since we have not used precise definitions for severity of appendicitis nor have we  
10 proposed criteria for different treatment strategies. We recognise that we have only reported  
11 outcomes to 30 days and plan further analysis of a larger patient cohort to include longer term follow-  
12 up particularly of the group of children managed thus far without surgery.

13  
14  
15  
16  
17  
18  
19  
20  
21 In conclusion we present evidence that the COVID-19 pandemic has had a marked impact on the  
22 management of children with appendicitis with clear shifts towards increased use of non-operative  
23 treatment and open (as opposed to laparoscopic) appendicectomy. Despite the absence of formal  
24 guidelines, non-operative treatment appears safe and effective in children who have been selected  
25 for this treatment modality. Overall these data should reassure surgeons about management strategy  
26 used during the pandemic in the face of restrictions to normal surgical services and may inform best  
27 practice in future times of limited surgical capacity.  
28  
29  
30  
31  
32  
33  
34  
35

### 36 CASCADE study steering and writing group:

37  
38  
39 George S Bethell (Southampton Children's Hospital and University of Southampton, Southampton,  
40 UK), Clare M Rees (Imperial College Healthcare NHS Trust, London, UK), Jonathan Sutcliffe (Leeds  
41 Teaching Hospitals NHS Trust, Leeds, UK), Nigel J Hall (Southampton Children's Hospital and University  
42 of Southampton, Southampton, UK)  
43  
44  
45  
46  
47  
48

### 49 Collaborators

50  
51 Anna-May Long, Florin Djendov, Victor Emordi, Cambridge University Hospitals; Mark Peter, Sarah  
52 Staight, Andrew Jackson, Huddersfield Royal Infirmary; Stewart Cleeve, Arun Kelay, Royal London  
53 Hospital; Michael Terry, Christina Major, Oscar Croysdale, Mike Nelson, St Mary's Hospital; Eleri  
54 Cusick, Hannah Rhodes, Juliette King, Sophie Lewis, Bristol Children's Hospital; Chris Driver, Gillian  
55 Winter, Royal Aberdeen Children's Hospital; Michael Wilson, Forth Valley Royal Hospital; Selena  
56 Curkovic, Raef Jackson, Bhushanrao Jadhav, University Hospital of Wales; Thomas Raymond, Vijay  
57  
58  
59  
60

1  
2  
3 Gangalam, Deepak Selvakumar, Thomas Raymond, Royal Lancaster Infirmary; Khalid Elmalik, Reda  
4 Habak, Muslim Abdullah, Mohamed Ahmed Osama, Leicester Royal Infirmary; Milan Gopal, Laura  
5 Phillips, Khlud Asanai, Hany Gabra, Great North Children's hospital; Noman Zafar, Sophia Lewis,  
6 Florence Kashora, Dixa Thakrar, Northwick Park Hospital; Dean Rex, Annita Budzanowski, St George's  
7 Hospital; Jennifer Binnington, Simon Timbrell, Megan Ridgeway, East Lancashire Hospital NHS trust;  
8 Shirley Chan, Amani Asour, Adetayo Aderombi, Medway Maritime Hospital; Donald Menzies, Ali  
9 Murtada, Corina Dragu, Vincent Quan, Colchester Hospital; Alan Askari, Krashna Patel, Luton and  
10 Dunstable University Hospital; Merrill McHoney, Hetal Patel, Sesi Hotonu, Ashley Meikle, Royal  
11 Hospital for Children, Edinburgh; Andrew Beamish, Royal Gwent Hospital, Newport; Ajay Belgaumkar,  
12 Bankole Oyewole, Prabhat Narayan, Surrey and Sussex Healthcare NHS Trust; Marianne Hollyman,  
13 Angeliki Kosti, Thomas Badenoch, Musgrove Park Hospital; Frances Goulder, Katie Siggens, Kizzie  
14 Peters, Fiona Kirkham, Royal Hampshire County Hospital, Winchester; Paul Froggatt, Karen Lai, Cristina  
15 Navarro, Dorinda Chandrabose, Poole Hospital; Simon Toh, Portsmouth Hospital NHS Trust; Ingo  
16 Jester, Ben Martin, Birmingham Women's and Children's Hospital; Elizabeth Gemmill, King's Mill  
17 Hospital; Richard Egan, Keira Lily, Morrision, Swansea; Mark Dilworth, Dimitrios Stamatiou,  
18 Birmingham Heartlands Hospital; Alasdair Macmillan, Joshua McIntyre, Danielle Clyde, Majid Rashid,  
19 Victoria Hospital Kirkcaldy; Gandrapu Srinivas, Torbay Hospital, Torquay Hospital; Katherine Buckley,  
20 Darren Smith, Wirral University Teaching Hospital NHS Trust; Henry Dowson, Gautam Singh, Frimley  
21 Park Hospital; Seshu Kumar Bylapudi, Milton Keynes University Hospital; Louise Phillips, Kimberley  
22 Hallam, Marisa Clemente, Tanzeela Gala, Glan Clwyd Hospital; Karol Pal, Borders General Hospital,  
23 Melrose; George Ninkovic-Hall, Emila Paul, Leighton Hospital; Theo Pelly, Joe Vance-Daniel, Kingston  
24 Hospital; Venkatesh Kanakala, Edward J Nevins, James Dixon, Michael John, James Cook University  
25 hospital; Jude Prince, Dale Vimalachandran, Countess of Chester NHS Foundation Trust; Georgios  
26 Karagiannidis, Ipswich Hospital NHS Trust; Suzette Samlalsingh, Chrsitine Ozone, Amina Bouhelal,  
27 Queen's Hospital, Barking, Havering and Redbridge University Hospitals NHS Trust; Siddhartha Handa,  
28 Furness General Hospital; Andrew Mitchell, Sathasivam Rajeev, Ellen Ross, Ali Wadah, Darlington  
29 Memorial Hospital; Tim Bradnock, John Hallett, Aileen Rooney, Royal Hospital for Children, Glasgow;  
30 Shirish Tewari, Vinay Shah, Vivek Gupta, Nick Reay-Jones, Lister Hospital; Salman Bodla, Nuha Yassin,  
31 New Cross Hospital Wolverhampton; Harriet Corbett, Sumita Chhabra, Alder Hey Children's Hospital;  
32 Athanasios Tyraskis, Benjamin Allin, Angus Fitchie, Oxford University Hospital Trust; Michael Stanton,  
33 Dina Fouad, Southampton Children's Hospital; Mark Vipond, Harry Dean, Matthew Boal, Oliver Brown,  
34 Gloucestershire Royal Hospital; Jonathan Goring, Mahmoud Marei, Christian Verhoef, Jonathan  
35 Ducey, Royal Manchester Childrens Hospital; Clare Rees, Chipo Mushonga, Dan Frith, Imperial College  
36 Healthcare NHS Trust; Ashok Ram, Tristan Boam, Melissa Gabriel, Ferzine Mohamed, Norfolk and  
37  
38  
39  
40  
41  
42  
43  
44  
45  
46  
47  
48  
49  
50  
51  
52  
53  
54  
55  
56  
57  
58  
59  
60

1  
2  
3 Norwich University Hospital; David Williams, Katie Cross, Nadine Dyar, Rick MacMahon, Mohammed  
4 Fakhrul-Aldeen, Iain Bain, David Bunting, North Devon District Hospital; Graham Branagan, Rachel  
5 Carten, Chee Wan Lai, Lydia Longstaff, Salisbury Hospital; Anindya Niyogi, Claudia Koh, Michael John,  
6 Christian Fox, Nottingham Children's Hospital; Stavros Loukogeorgakis, Joe Curry, Kate Cross, Jayaram  
7 Sivaraj, Great Ormond Street Hospital; Sean Marven, Milda Jancauskaite, Helen Please, Wayne  
8 Fradley, Sheffield Childrens Hospital; Fenella Welsh, Maki Jitsumara, Basingstoke Hospital; Sinead  
9 Hassett, Ancuta Muntean, Ionica Stoica, Sarah Yassin, Children's Health Ireland, Crumlin; Suzanne  
10 Lawther, David Colvin, Ciaran Durand, Royal Belfast Hospital for Sick Children; Mohamed Eltom, Hull  
11 University Teaching Hospital; Iain Yardley, Kirsty Brennan, Clara Chong, Evelina Hospital; Hasan  
12 Mukhtar, Hany Khalil, Stephanie Clark, Whittington Health NHS trust; Ashish Desai, Ben Woodward,  
13 Kings College Hospital; Amulya Saxena, Joshua Cave, Chelsea and Westminster Hospital; Alistair  
14 Sharples, University Hospitals of North Midlands.

## References

1. Giuliani S, Cecil EV, Apelt N, Sharland M, Saxena S. Pediatric Emergency Appendectomy and 30-Day Postoperative Outcomes in District General Hospitals and Specialist Pediatric Surgical Centers in England, April 2001 to March 2012: Retrospective Cohort Study. *Ann Surg.* 2016;263(1):184-90.
2. Hall NJ. CONservative TRreatment of Appendicitis in Children a randomised controlled Trial CONTRACT (Feasibility study). *health technol Assess* 2020;in press.
3. De Simone B, Chouillard E, Di Saverio S, Pagani L, Sartelli M, Biffi WL, et al. Emergency surgery during the COVID-19 pandemic: what you need to know for practice. *Ann R Coll Surg Engl.* 2020;102(5):323-32.
4. Hettiaratchy S, Deakin D. Joint guidance for surgeons: guidance for surgeons working during the COVID-19 pandemic from the Surgical Royal Colleges of the United Kingdom and Ireland. Royal College of Surgeons of England. <https://www.rcseng.ac.uk/coronavirus/joint-guidance-for-surgeons-v1/2020>.
5. Collaborative C. Mortality and pulmonary complications in patients undergoing surgery with perioperative SARS-CoV-2 infection: an international cohort study. *Lancet.* 2020;396(10243):27-38.

- 1  
2  
3 6. Munro AR, D. THE MISSING LINK? CHILDREN AND TRANSMISSION OF SARS-COV-2 2020  
4  
5 [Available from: [https://dontforgetthebubbles.com/the-missing-link-children-and-transmission-of-](https://dontforgetthebubbles.com/the-missing-link-children-and-transmission-of-sars-cov-2/)  
6  
7 sars-cov-2/.
- 8  
9  
10 7. Harris PA, Taylor R, Thielke R, Payne J, Gonzalez N, Conde JG. Research electronic data capture  
11  
12 (REDCap)--a metadata-driven methodology and workflow process for providing translational research  
13  
14 informatics support. *J Biomed Inform.* 2009;42(2):377-81.
- 15  
16 8. Sherratt FC, Allin BSR, Kirkham JJ, Walker E, Young B, Wood W, et al. Core outcome set for  
17  
18 uncomplicated acute appendicitis in children and young people. *Br J Surg.* 2020.
- 19  
20 9. von EE, Altman DG, Egger M, Pocock SJ, Gotsche PC, Vandembroucke JP. The Strengthening  
21  
22 the Reporting of Observational Studies in Epidemiology (STROBE) statement: guidelines for reporting  
23  
24 observational studies. *J Clin Epidemiol.* 2008;61(4):344-9.
- 25  
26 10. Minneci PC, Mahida JB, Lodwick DL, Sulkowski JP, Nacion KM, Cooper JN, et al. Effectiveness  
27  
28 of Patient Choice in Nonoperative vs Surgical Management of Pediatric Uncomplicated Acute  
29  
30 Appendicitis. *JAMA Surg.* 2015:1-8.
- 31  
32 11. Armstrong J, Merritt N, Jones S, Scott L, Butter A. Non-operative management of early, acute  
33  
34 appendicitis in children: is it safe and effective? *J Pediatr Surg.* 2014;49(5):782-5.
- 35  
36 12. Gorter RR, van der Lee JH, Cense HA, Kneepkens CM, Wijnen MH, In 't Hof KH, et al. Initial  
37  
38 antibiotic treatment for acute simple appendicitis in children is safe: Short-term results from a  
39  
40 multicenter, prospective cohort study. *Surgery.* 2015;157(5):916-23.
- 41  
42 13. Bethell G, Adams S, Johnson T, Hall N, Stanton M. Laparoscopy uptake for paediatric  
43  
44 appendicectomy – a comparison of adult general surgeons vs paediatric surgeons in England from  
45  
46 1997 to 2015. 66<sup>th</sup> British Association of Paediatric Surgeons Annual International Congress;  
47  
48 Nottingham, UK. 2019.
- 49  
50 14. Collaborative RSGWMR. Appendicitis risk prediction models in children presenting with right  
51  
52 iliac fossa pain (RIFT study): a prospective, multicentre validation study. *Lancet Child Adolesc Health.*  
53  
54 2020;4(4):271-80.
- 55  
56  
57  
58  
59  
60

1  
2  
3 15. Donnelly L. Women needlessly having their appendix out in almost one in three cases. The  
4  
5 Daily Telegraph. 2019.  
6

7 16. Tiboni S, Bhangu A, Hall NJ. Outcome of appendicectomy in children performed in paediatric  
8  
9 surgery units compared with general surgery units. Br J Surg. 2014;101(6):707-14.  
10  
11  
12  
13  
14  
15  
16  
17  
18  
19  
20  
21  
22  
23  
24  
25  
26  
27  
28  
29  
30  
31  
32  
33  
34  
35  
36  
37  
38  
39  
40  
41  
42  
43  
44  
45  
46  
47  
48  
49  
50  
51  
52  
53  
54  
55  
56  
57  
58  
59  
60

Confidential: For Review Only

## Initial Management of Suspected Appendicitis Operative vs non-operative per week

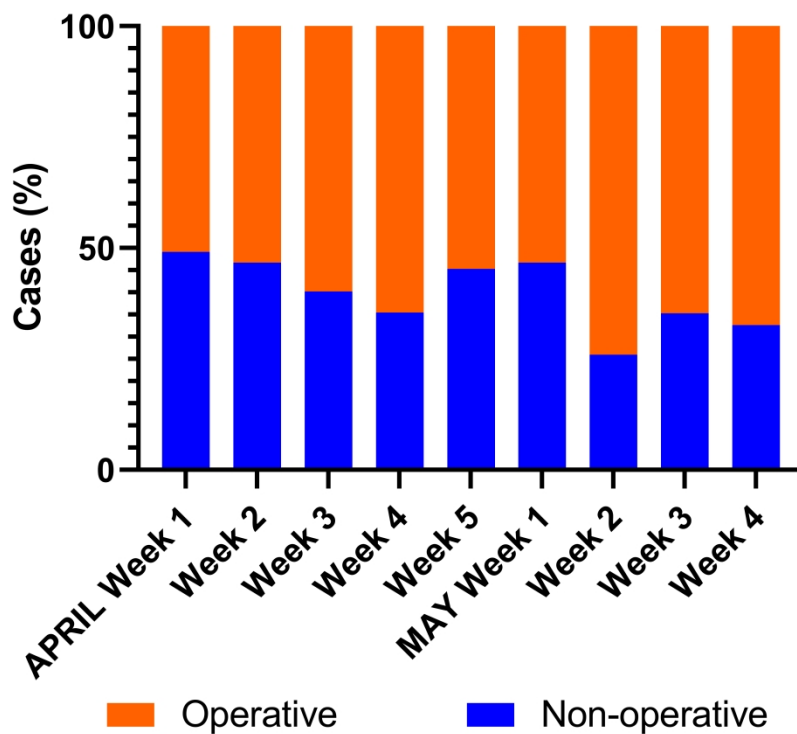

114x105mm (1200 x 1200 DPI)



1  
2  
3  
4  
5  
6  
7  
8  
9  
10  
11  
12  
13  
14  
15  
16  
17  
18  
19  
20  
21  
22  
23  
24  
25  
26  
27  
28  
29  
30  
31  
32  
33  
34  
35  
36  
37  
38  
39  
40  
41  
42  
43  
44  
45  
46  
47  
48  
49  
50  
51  
52  
53  
54  
55  
56  
57  
58  
59  
60

### Initial Management of Suspected Appendicitis Open vs Laparoscopic per week

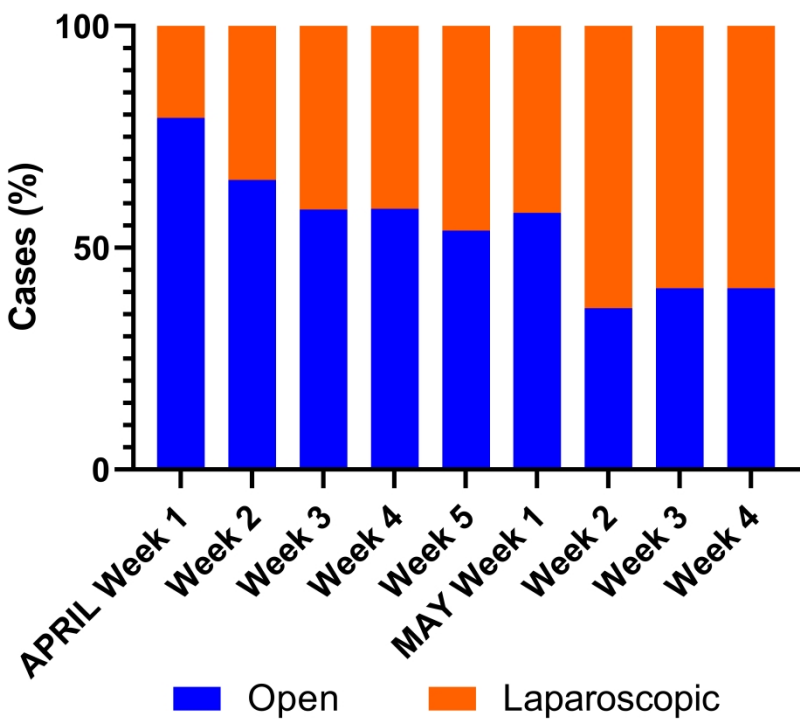

114x103mm (1200 x 1200 DPI)

# Children with Appendicitis during the Coronavirus pandemic (CASCADE)

The current coronavirus pandemic is placing NHS services in an unprecedented situation and there will be impact on the delivery of care for non-coronavirus patients. Guidance from the Royal Colleges recommends change in standard surgical treatment pathways. Clinicians may decide or be encouraged to consider treating some conditions differently to their usual practice. This will certainly have an impact on practice and may influence outcomes.

The management of children with acute appendicitis is one such condition. A number of different treatment options exist and current pathways may well be changed in some centres.

This CASCADE study has been set-up to capture data relating to this.

This initial survey aims to capture the current and anticipated impact of the coronavirus pandemic on treatment of children with acute appendicitis. It comprises just 4 questions and should take no more than 5 minutes to complete.

It is for completion by consultants only please. This is not because we don't value the views of trainees but in this particular instance we feel that consultants are more likely than ever going to be making decisions.

We will generate a rapid summary of the data in order to provide you with an overview of how practice is changing across the country and to share ideas for change that are considered useful.

All responses will be treated anonymously. Please complete the entire survey for your responses to be saved.

## Definitions

For the purposes of the questions that follow please use the following definitions:

**SIMPLE APPENDICITIS:** a child with a presumed clinical or radiological diagnosis of simple appendicitis.

**COMPLICATED APPENDICITIS:** a child with a presumed clinical or radiological diagnosis of complicated appendicitis (comprising anything other than simple appendicitis but not an appendix mass).

**APPENDIX MASS:** a child that has a presumed clinical or radiological diagnosis of an appendix mass.

We appreciate it is not always possible to make an accurate distinction between these groups but please answer the questions the best you can according to these definitions.

**Question 1**

In the past 2 weeks have you managed a child with acute appendicitis differently to your usual practice as a result of the coronavirus pandemic?

- Yes
- No

In what way was your management of SIMPLE APPENDICITIS different to your usual practice?

- Simple appendicitis: used non-operative treatment as opposed to appendicectomy
  - Simple appendicitis: used enteral antibiotics or shorter course of IV if managing conservatively
  - Simple appendicitis: longer delay than usual in gaining access to operating theatre
  - Simple appendicitis: used open approach in place of laparoscopy
- (Tick all that apply)

In what way was your management of COMPLICATED APPENDICITIS different to your usual practice?

- Complicated appendicitis: used non-operative treatment as opposed to appendicectomy
  - Complicated appendicitis: earlier switch to oral antibiotics
  - Complicated appendicitis: longer delay than usual in gaining access to operating theatre
  - Complicated appendicitis: used open approach in place of laparoscopy
  - Appendix mass: non-operative treatment as opposed to appendicectomy
  - Appendix mass: no offer of interval appendicectomy as opposed to routine offering of interval appendicectomy
- (Tick all that apply)

In what way were these GENERAL ASPECTS OF MANAGEMENT different?

- Any appendicitis: routine imaging for all to be certain of diagnosis
  - Any appendicitis: CT instead of US (including use of chest CT or to protect staff)
  - Any appendicitis: transfer of a child to our hospital for treatment when that treatment would usually be provided at local hospital
- (Tick all that apply)

Was this different management brought about:

- as an active decision by you / your department
  - as a passive decision due to different resource availability (e.g. you could not get a child to surgery and they got better on antibiotics)
  - on the instruction of your department / institution / NHSE
  - instigated by the parents
- (Tick all that apply)

**Question 2**

Thinking ahead and given what you currently know about the likely effect the coronavirus pandemic will have, please indicate if you anticipate that you will manage children with acute appendicitis differently compared to your usual practice DURING the pandemic (for example you may be considering different thresholds for imaging, or the use of non-operative treatment in place of appendicectomy).

- Yes - differently  
 No - usual practice

If yes, in what way do you currently anticipate there will be differences for children with SIMPLE APPENDICITIS?

Please only tick the box if you anticipate your management will be different to your usual practice for the specific clinical situation listed.

- Simple appendicitis: I will actively offer non-operative treatment to all children with simple appendicitis  
 Simple appendicitis: I will consider non-operative treatment for children with simple appendicitis at parental request  
 Simple appendicitis: I will actively perform open (as opposed to laparoscopic) appendicectomy in children with simple appendicitis  
(Tick all that apply)

If yes, in what way do you currently anticipate there will be differences for children with COMPLICATED APPENDICITIS?

Please only tick the box if you anticipate your management will be different to your usual practice for the specific clinical situation listed.

- Complicated appendicitis: I will actively offer non-operative treatment to children with complicated appendicitis  
 Complicated appendicitis: I will consider non-operative treatment to children with complicated appendicitis at parental request  
 Complicated appendicitis: I will actively perform open (as opposed to laparoscopic) appendicectomy in children with complicated appendicitis  
 Complicated appendicitis: I will actively pursue a shorter than usual course of intravenous antibiotics in children with complicated appendicitis  
 Appendix mass: I will actively offer non-operative treatment to children with appendix mass  
 Appendix mass: I will consider non-operative treatment to children with appendix mass at parental request  
 Appendix mass: I will not offer routine interval appendicectomy in children who have had successful non-operative treatment of appendix mass  
(Tick all that apply)

1 If yes, in what way do you currently anticipate there  
2 will be differences in the GENERAL MANAGEMENT of  
3 children with appendicitis?  
4

5 Please only tick the box if you anticipate your  
6 management will be different to your usual practice  
7 for the specific clinical situation listed.  
8

- Any appendicitis: Routine imaging for all cases of suspected appendicitis to be certain of diagnosis
  - Any appendicitis: CT scan instead of US for diagnosis of appendicitis
  - Any appendicitis: More frequent use of imaging to guide management (e.g. select cases for non-operative treatment / reduce negative appendicectomy rate)
  - Any appendicitis: consultant review for all cases prior to considering surgery
  - Any appendicitis: we will likely be sending children with appendicitis to another hospital for treatment
  - Any appendicitis: we will likely be treating children at my hospital who would usually be treated somewhere else
- (Tick all that apply)

Confidential: For Review Only

9  
10  
11  
12  
13  
14  
15  
16  
17  
18  
19  
20  
21  
22  
23  
24  
25  
26  
27  
28  
29  
30  
31  
32  
33  
34  
35  
36  
37  
38  
39  
40  
41  
42  
43  
44  
45  
46  
47  
48  
49  
50  
51  
52  
53  
54  
55  
56  
57  
58  
59  
60

1  
2  
3  
4  
5  
6  
7  
8  
9  
10  
11  
12  
13  
14  
15  
16  
17  
18  
19  
20  
21  
22  
23  
24  
25  
26  
27  
28  
29  
30  
31  
32  
33  
34  
35  
36  
37  
38  
39  
40  
41  
42  
43  
44  
45  
46  
47  
48  
49  
50  
51  
52  
53  
54  
55  
56  
57  
58  
59  
60

**Question 3**

Thus far during this pandemic, has your department or your institution made any decisions or placed any restrictions on you that you feel will influence how you manage children with acute appendicitis that are not included in responses to the questions above

Yes  
 No

Please describe

\_\_\_\_\_

Confidential: For Review Only

1 **Question 4**

2  
3 Do you have any suggestions for practice change  
4 during the pandemic in relation to acute  
5 appendicitis that you wish to share? These may be  
6 useful to help other institutions manage children  
7 with appendicitis.

8 Any suggestions will be treated anonymously.  
9

10  
11  
12  
13  
14  
15  
16  
17  
18  
19  
20  
21  
22  
23  
24  
25  
26  
27  
28  
29  
30  
31  
32  
33  
34  
35  
36  
37  
38  
39  
40  
41  
42  
43  
44  
45  
46  
47  
48  
49  
50  
51  
52  
53  
54  
55  
56  
57  
58  
59  
60

Confidential: For Review Only

1  
2  
3  
4  
5  
6  
7  
8  
9  
10  
11  
12  
13  
14  
15  
16  
17  
18  
19  
20  
21  
22  
23  
24  
25  
26  
27  
28  
29  
30  
31  
32  
33  
34  
35  
36  
37  
38  
39  
40  
41  
42  
43  
44  
45  
46  
47  
48  
49  
50  
51  
52  
53  
54  
55  
56  
57  
58  
59  
60

**Last page**

In order to ensure that we send you a copy of the rapid summary findings of this survey, please provide your email address.

(Whilst this is optional it would be really great if as many people as possible would be willing to complete a survey later in the year so we can maximise the opportunities for learning.)

We will also send you a link to the survey at the end of the pandemic so we can understand the impact better.

Please enter the name of the institution at which you work (this is just so we can identify responses from the same centre)

\_\_\_\_\_

Are you a

- General Surgeon
- Specialist Paediatric Surgeon

If you wish to receive acknowledgement of your participation in this national survey please provide your name.

\_\_\_\_\_

Confidential: For Review Only



STROBE Statement—Checklist of items that should be included in reports of *cohort studies*

|                              | Item No | Recommendation                                                                                                                                                                                                                                                                                                         | Page No  |
|------------------------------|---------|------------------------------------------------------------------------------------------------------------------------------------------------------------------------------------------------------------------------------------------------------------------------------------------------------------------------|----------|
| <b>Title and abstract</b>    | 1       | (a) Indicate the study's design with a commonly used term in the title or the abstract<br>(b) Provide in the abstract an informative and balanced summary of what was done and what was found                                                                                                                          | 2<br>2-3 |
| <b>Introduction</b>          |         |                                                                                                                                                                                                                                                                                                                        |          |
| Background/rationale         | 2       | Explain the scientific background and rationale for the investigation being reported                                                                                                                                                                                                                                   | 4        |
| Objectives                   | 3       | State specific objectives, including any prespecified hypotheses                                                                                                                                                                                                                                                       | 4        |
| <b>Methods</b>               |         |                                                                                                                                                                                                                                                                                                                        |          |
| Study design                 | 4       | Present key elements of study design early in the paper                                                                                                                                                                                                                                                                | 5        |
| Setting                      | 5       | Describe the setting, locations, and relevant dates, including periods of recruitment, exposure, follow-up, and data collection                                                                                                                                                                                        | 5        |
| Participants                 | 6       | (a) Give the eligibility criteria, and the sources and methods of selection of participants. Describe methods of follow-up<br>(b) For matched studies, give matching criteria and number of exposed and unexposed                                                                                                      | 5        |
| Variables                    | 7       | Clearly define all outcomes, exposures, predictors, potential confounders, and effect modifiers. Give diagnostic criteria, if applicable                                                                                                                                                                               | 6        |
| Data sources/<br>measurement | 8*      | For each variable of interest, give sources of data and details of methods of assessment (measurement). Describe comparability of assessment methods if there is more than one group                                                                                                                                   | 6        |
| Bias                         | 9       | Describe any efforts to address potential sources of bias                                                                                                                                                                                                                                                              | 6        |
| Study size                   | 10      | Explain how the study size was arrived at                                                                                                                                                                                                                                                                              | 5        |
| Quantitative variables       | 11      | Explain how quantitative variables were handled in the analyses. If applicable, describe which groupings were chosen and why                                                                                                                                                                                           | 6        |
| Statistical methods          | 12      | (a) Describe all statistical methods, including those used to control for confounding<br>(b) Describe any methods used to examine subgroups and interactions<br>(c) Explain how missing data were addressed<br>(d) If applicable, explain how loss to follow-up was addressed<br>(e) Describe any sensitivity analyses | 6        |
| <b>Results</b>               |         |                                                                                                                                                                                                                                                                                                                        |          |
| Participants                 | 13*     | (a) Report numbers of individuals at each stage of study—eg numbers potentially eligible, examined for eligibility, confirmed eligible, included in the study, completing follow-up, and analysed<br>(b) Give reasons for non-participation at each stage<br>(c) Consider use of a flow diagram                        | 7,8      |
| Descriptive data             | 14*     | (a) Give characteristics of study participants (eg demographic, clinical, social) and information on exposures and potential confounders<br>(b) Indicate number of participants with missing data for each variable of interest<br>(c) Summarise follow-up time (eg, average and total amount)                         | 8        |
| Outcome data                 | 15*     | Report numbers of outcome events or summary measures over time                                                                                                                                                                                                                                                         | 9,10     |

|    |                          |    |                                                                                                                                                                                                              |       |
|----|--------------------------|----|--------------------------------------------------------------------------------------------------------------------------------------------------------------------------------------------------------------|-------|
| 1  | Main results             | 16 | (a) Give unadjusted estimates and, if applicable, confounder-adjusted estimates and their precision (eg, 95% confidence interval). Make clear which confounders were adjusted for and why they were included | 9,10  |
| 2  |                          |    | (b) Report category boundaries when continuous variables were categorized                                                                                                                                    |       |
| 3  |                          |    | (c) If relevant, consider translating estimates of relative risk into absolute risk for a meaningful time period                                                                                             |       |
| 4  |                          |    |                                                                                                                                                                                                              |       |
| 5  |                          |    |                                                                                                                                                                                                              |       |
| 6  |                          |    |                                                                                                                                                                                                              |       |
| 7  |                          |    |                                                                                                                                                                                                              |       |
| 8  |                          |    |                                                                                                                                                                                                              |       |
| 9  | Other analyses           | 17 | Report other analyses done—eg analyses of subgroups and interactions, and sensitivity analyses                                                                                                               | 10,11 |
| 10 |                          |    |                                                                                                                                                                                                              |       |
| 11 | <b>Discussion</b>        |    |                                                                                                                                                                                                              |       |
| 12 |                          |    |                                                                                                                                                                                                              |       |
| 13 | Key results              | 18 | Summarise key results with reference to study objectives                                                                                                                                                     | 12,13 |
| 14 | Limitations              | 19 | Discuss limitations of the study, taking into account sources of potential bias or imprecision. Discuss both direction and magnitude of any potential bias                                                   | 14    |
| 15 |                          |    |                                                                                                                                                                                                              |       |
| 16 | Interpretation           | 20 | Give a cautious overall interpretation of results considering objectives, limitations, multiplicity of analyses, results from similar studies, and other relevant evidence                                   | 14    |
| 17 |                          |    |                                                                                                                                                                                                              |       |
| 18 |                          |    |                                                                                                                                                                                                              |       |
| 19 | Generalisability         | 21 | Discuss the generalisability (external validity) of the study results                                                                                                                                        | 14    |
| 20 |                          |    |                                                                                                                                                                                                              |       |
| 21 | <b>Other information</b> |    |                                                                                                                                                                                                              |       |
| 22 | Funding                  | 22 | Give the source of funding and the role of the funders for the present study and, if applicable, for the original study on which the present article is based                                                | 7     |
| 23 |                          |    |                                                                                                                                                                                                              |       |
| 24 |                          |    |                                                                                                                                                                                                              |       |

\*Give information separately for exposed and unexposed groups.

**Note:** An Explanation and Elaboration article discusses each checklist item and gives methodological background and published examples of transparent reporting. The STROBE checklist is best used in conjunction with this article (freely available on the Web sites of PLoS Medicine at <http://www.plosmedicine.org/>, Annals of Internal Medicine at <http://www.annals.org/>, and Epidemiology at <http://www.epidem.com/>). Information on the STROBE Initiative is available at <http://www.strobe-statement.org>.

# Children with Appendicitis during the Coronavirus pandemic (CASCADE)

## Introduction

The current coronavirus pandemic is placing NHS services in an unprecedented situation and there will be impact of the delivery of care for non-coronavirus patients. It has been suggested that where alternative non-surgical treatment approaches exist for a given condition, some may be more suitable in these times for a variety of reasons.

The management of children with acute appendicitis is a clinical scenario in which it is recognised there are a number of different treatment options and existing variation in management across the UK. This project aims to understand the impact of the COVID-19 pandemic on the management of children with appendicitis in the UK and to summarise outcomes of this patient population during this time period.

## Methods

This will be a mixed methods study comprising 3 components:

1. A brief survey of consultant surgeons regarding the current and anticipated impact of COVID-19 on the management of children with acute appendicitis to be distributed as soon as possible. All responses will be treated anonymously and an early response summary will be distributed to all participants in the anticipation that the findings may guide or influence practice during the pandemic.
2. A patient level cohort study that will collect data on what treatment was provided to individual cases and what the outcomes were (data will be collected locally and anonymous data forwarded to the coordinating centre on a monthly basis). This will run until the end of the pandemic.
3. At the end of the pandemic a survey of consultant surgeons to understand what happened differently, how effective this was perceived to be, what learning there has been about how we manage appendicitis.

## Data to be collected

A minimum dataset on each case of appendicitis will be recorded using an excel spreadsheet distributed to each participating centre. Each centre will be asked to return the spreadsheet for all cases discharged within a given calendar month.

- The surveys will be administered via REDCap.
- The first survey will be distributed during the week beginning March 30<sup>th</sup> 2020
- Prospective data collection will start April 1<sup>st</sup> 2020
- The final survey will be distributed at the end of the pandemic at a timepoint agreed by the study team.

## Centres

All UK centres that treat children with appendicitis are encouraged to participate. Results will be shared with all those who participate as soon as they are available.

## Approvals

Each participating centre will be asked to register this as a service evaluation. The study meets the criteria for a service evaluation according to the HRA guidance.

## Study team

Nigel Hall (Southampton – lead centre), Clare Rees (St Marys Hospital, London), Jonathan Sutcliffe (Leeds), George Bethell (Southampton – Data co-ordinator). All units in the UK that treat children with appendicitis will be encouraged to collaborate with a named consultant and at least one trainee at each centre. If any published article arises from this work then all those who collaborate will be acknowledged under a group authorship model.

## Contact point for queries

[CASCADEstudy2020@gmail.com](mailto:CASCADEstudy2020@gmail.com)

# BMJ Paediatrics Open

## Management and early outcomes of children with appendicitis in the UK during the COVID-19 pandemic: a survey of surgeons and observational study

|                               |                                                                                                                                                                                                                                                                          |
|-------------------------------|--------------------------------------------------------------------------------------------------------------------------------------------------------------------------------------------------------------------------------------------------------------------------|
| Journal:                      | <i>BMJ Paediatrics Open</i>                                                                                                                                                                                                                                              |
| Manuscript ID                 | bmjpo-2020-000831.R1                                                                                                                                                                                                                                                     |
| Article Type:                 | Original research                                                                                                                                                                                                                                                        |
| Date Submitted by the Author: | 08-Sep-2020                                                                                                                                                                                                                                                              |
| Complete List of Authors:     | Bethell, George; University of Southampton Faculty of Medicine, University Surgical Unit<br>Rees, Clare; Imperial College Healthcare NHS Trust<br>Sutcliffe, Jonathan; Leeds Teaching Hospitals NHS Trust<br>Hall, Nigel; University of Southampton, Faculty of Medicine |
| Keywords:                     | Gastroenterology                                                                                                                                                                                                                                                         |
|                               |                                                                                                                                                                                                                                                                          |

SCHOLARONE™  
Manuscripts



I, the Submitting Author has the right to grant and does grant on behalf of all authors of the Work (as defined in the below author licence), an exclusive licence and/or a non-exclusive licence for contributions from authors who are: i) UK Crown employees; ii) where BMJ has agreed a CC-BY licence shall apply, and/or iii) in accordance with the terms applicable for US Federal Government officers or employees acting as part of their official duties; on a worldwide, perpetual, irrevocable, royalty-free basis to BMJ Publishing Group Ltd ("BMJ") its licensees and where the relevant Journal is co-owned by BMJ to the co-owners of the Journal, to publish the Work in this journal and any other BMJ products and to exploit all rights, as set out in our [licence](#).

The Submitting Author accepts and understands that any supply made under these terms is made by BMJ to the Submitting Author unless you are acting as an employee on behalf of your employer or a postgraduate student of an affiliated institution which is paying any applicable article publishing charge ("APC") for Open Access articles. Where the Submitting Author wishes to make the Work available on an Open Access basis (and intends to pay the relevant APC), the terms of reuse of such Open Access shall be governed by a Creative Commons licence – details of these licences and which [Creative Commons](#) licence will apply to this Work are set out in our licence referred to above.

Other than as permitted in any relevant BMJ Author's Self Archiving Policies, I confirm this Work has not been accepted for publication elsewhere, is not being considered for publication elsewhere and does not duplicate material already published. I confirm all authors consent to publication of this Work and authorise the granting of this licence.

1  
2  
3  
4  
5 Management and early outcomes of children with appendicitis in  
6  
7  
8 the UK during the COVID-19 pandemic: a survey of surgeons  
9  
10  
11 and observational study  
12  
13

14  
15 *CASCADE study collaborators*  
16

17 Members of the CASCADE study collaborators group are listed in the Acknowledgement section.  
18  
19

20  
21  
22 The Corresponding Author has the right to grant on behalf of all authors and does grant on behalf of  
23 all authors, an exclusive licence (or non exclusive for government employees) on a worldwide basis to  
24 the BMJ Publishing Group Ltd to permit this article (if accepted) to be published in BMJ editions and  
25 any other BMJ PGL products and sublicences such use and exploit all subsidiary rights, as set out in our  
26 licence."  
27  
28  
29

30  
31  
32 All authors have completed the Unified Competing Interest form (available on request from the  
33 corresponding author) and declare: no support from any organisation for the submitted work; no  
34 financial relationships with any organisations that might have an interest in the submitted work in the  
35 previous three years, no other relationships or activities that could appear to have influenced the  
36 submitted work.  
37  
38  
39  
40  
41

42  
43  
44  
45 Data sharing statement – Reasonable requests of relevant data will be considered.  
46  
47  
48

49  
50 **Corresponding author and guarantor:**

51 Nigel J Hall  
52 University Surgical Unit  
53 Faculty of Medicine  
54 University of Southampton  
55 Tremona Road  
56 Southampton  
57 SO16 6YD  
58 [n.j.hall@soton.ac.uk](mailto:n.j.hall@soton.ac.uk)  
59  
60

1  
2  
3  
4  
5  
6  
7  
8  
9  
10  
11  
12  
13  
14  
15  
16  
17  
18  
19  
20  
21  
22  
23  
24  
25  
26  
27  
28  
29  
30  
31  
32  
33  
34  
35  
36  
37  
38  
39  
40  
41  
42  
43  
44  
45  
46  
47  
48  
49  
50  
51  
52  
53  
54  
55  
56  
57  
58  
59  
60

023 8120 6146

Confidential: For Review Only

## Abstract

### **Objectives**

Acute appendicitis is the most common surgical condition in children. In the UK appendicectomy is the most common treatment with non-operative management unusual. Due to concerns about the risk of SARS-CoV-2 transmission during surgical procedures, surgeons were advised to consider non-operative treatment and avoid laparoscopy where possible. This study aims to report management and outcomes, to date, of children with appendicitis in the United Kingdom and Ireland during the COVID-19 pandemic.

### **Design**

Survey of consultant surgeons who treat children with appendicitis that informed a prospective multicentre observational cohort study.

### **Setting**

Data were collected from centres in the United Kingdom and Ireland for cases admitted between April 1st and May 31<sup>st</sup> 2020 (first 2 months of the COVID-19 pandemic) at both general surgical and specialist paediatric surgical centres.

### **Participants**

The study cohort includes 838 children with a clinical and/or radiological diagnosis of acute appendicitis of which 527 (63%) were male.

### **Main outcomes measured**

Primary outcome was treatment strategy used for acute appendicitis. Other outcomes reported include change in treatment strategy over time, use of diagnostic imaging and important patient outcomes to 30 days following hospital admission.

### **Results**

From very early in the pandemic surgeons experienced a change in their management of children with appendicitis and almost all surgeons who responded to the survey anticipated further changes during the pandemic. Overall 326/838 (39%) were initially treated non-operatively of whom 81/326 (25%) proceeded to appendicectomy within the initial hospital admission. Of cases treated initially surgically 243/512 (48%) were performed laparoscopically. Diagnostic imaging was used in 445/838 (53%) children. Cases treated non-operatively had a shorter hospital stay than those treated surgically but



1  
2  
3 hospital readmissions within 30 days were similar between groups. In cases treated surgically the  
4 negative appendectomy rate was 4.5%. There was a trend towards increased use of surgical  
5 treatment and from open to laparoscopic appendectomy as the pandemic progressed.  
6  
7

### 8 9 **Conclusion**

10  
11 Non-operative treatment of appendicitis has been widely used for the first time in children in the UK  
12 and Ireland and is safe and effective in selected patients. Overall patient outcomes do not appear to  
13 have been adversely impacted by change in management during the pandemic thus far.  
14  
15  
16  
17  
18  
19

### 20 **What is known about the subject**

- 21
- 22
- 23 • Acute appendicitis is a common condition in children and in the UK is typically treated with  
24 emergency appendectomy
- 25
- 26 • The SARS-CoV-2 pandemic has caused widespread disruption to healthcare delivery and  
27 surgeons were advised to alter their usual practice due to possible viral transmission during  
28 surgery
- 29
- 30 • How the pandemic would impact on the management and outcomes of children with  
31 appendicitis was unclear  
32  
33  
34  
35

### 36 **What this study adds**

- 37
- 38
- 39 • During the first two months of the pandemic, nearly 40% of all cases of appendicitis were  
40 managed non-operatively
- 41
- 42 • Non-operative treatment appears a safe alternative to surgery for selected cases in this real  
43 world setting and overall treatment outcomes are satisfactory  
44  
45  
46  
47  
48  
49  
50  
51  
52  
53  
54  
55  
56  
57  
58  
59  
60

## Introduction

Acute appendicitis is the most common surgical condition in children and affects approximately 8% of all people throughout their lifetime. In the United Kingdom (UK) treatment of children with appendicitis is shared between general surgeons in district general hospitals and specialist paediatric surgeons at specialist paediatric centres[1] but typically treatment is surgical with the majority of cases undergoing urgent appendicectomy. Although international guidelines do support the use of non-operative treatment for selected children with uncomplicated acute appendicitis [2], non-operative treatment is not widespread in the UK being used by only a small minority of surgeons or as part of a research study.[3]

The SARS-CoV-2 (COVID-19) pandemic has caused widespread disruption to hospitals worldwide. The disruption to the delivery of acute surgical services was anticipated to impact how children with appendicitis were managed for a wide variety of reasons including staff redeployment, operating theatre availability and concerns about transmission of SARS-CoV-2 from patients to healthcare staff during anaesthesia and surgical procedures, particularly during laparoscopic procedures.[4] Early guidance from the Royal College of Surgeons England suggested that laparoscopy should only be used in procedures where the risk of an open procedure to the patient outweighed the potential risk to staff in theatre as laparoscopy was believed to be an aerosol generating procedure (AGP).[4] It was also recommended that non-operative treatment should be used to avoid surgery for all conditions, including appendicitis, if it was considered an acceptable alternative treatment option.[5] In addition it has been shown that exposing a patient with COVID-19 to a surgical procedure has a significant adverse impact on outcome.[6] This may also have influenced surgeons towards greater use of non-operative treatment for children with appendicitis, although data emerged through the first months of the pandemic that children are much less likely to become infected with COVID-19 than adults and the impact of COVID-19 on outcomes following surgery in children is less clear.[7]

The CASCADE study (Children with Appendicitis during the CoronAvirus panDEmic) was initiated in late March 2020 to capture data relating to the impact of this disruption on the management and outcomes of children with appendicitis during the pandemic. The study comprised a rapid survey of surgeons in the UK who treat children to understand the current or anticipated impact of the pandemic on management of children with appendicitis followed by an observational cohort study. This report details the findings of the survey and the management observed during the first 2 months of the pandemic in the UK and early (30 day) outcomes. It is provided to assist surgeons with clinical decision making throughout the pandemic and in the event that there is a second wave resulting in further disruption to acute surgical services.

## Methods

### Survey of surgeons who treat children

A survey was designed to understand the impact of the pandemic on treatment being offered to children with acute appendicitis at the start of the pandemic. Questions were developed, piloted on a convenience sample of surgeons and modified prior to survey distribution. The survey was approved by the research committee of the British Association of Paediatric Surgeons. Specialist paediatric and general surgeons who treat children with appendicitis were invited to complete the survey during the 2-week period leading up to April 14<sup>th</sup> 2020. Invitations were made via personal contacts, social media and mailshots from the British Association of Paediatric Surgeons and the survey was advertised repeatedly through these channels. The survey was administered online using REDCap data capture tool [8] and is available in supplementary material S1. Questions asked were focussed around understanding the impact of the COVID-19 pandemic on the management of children with appendicitis experienced to date, the anticipated impact over the coming weeks and the rationale behind any change in management.

### Cohort study design

This is a prospective multicentre observational cohort study of children aged less than 16 years at time of hospital admission diagnosed with and treated for acute appendicitis in the UK and Ireland. This includes children treated by general surgeons and specialist paediatric surgeons. Participating hospitals were not required to alter diagnostic or treatment pathways and no changes were made to patient care as part of this study. Data collection for the study commenced April 1<sup>st</sup> 2020.

### Centre recruitment and patient identification

Hospitals providing acute surgical care to children were invited to participate in this study via a number of channels including targeted emails, newsletters, social media and websites of surgical and paediatric national organisations including the British Association of Paediatric Surgeons, the Royal College of Surgeons of England, and the Royal College of Paediatrics and Child Health. Children were included in the study if they were diagnosed with and treated for acute appendicitis in hospital. Diagnosis was based on clinical and/or radiological criteria. Children who presented with abdominal pain but not felt to have appendicitis were excluded. This report includes all children in the study dataset with an initial admission date between April 1<sup>st</sup> 2020 and May 31<sup>st</sup> 2020 and for whom 30-day

1  
2  
3 outcome data was provided to the coordinating team by the data cut-off date of 13<sup>th</sup> July 2020. Follow-  
4 up data was censored at 30 days post hospital discharge from initial admission.  
5  
6

## 7 8 Ethical considerations 9

10 This study was registered at each site as a service evaluation, as defined by the health research  
11 authority guidance, as this was an observational study only collecting anonymised routine data with  
12 no change to clinical care pathways.  
13  
14

## 15 16 Outcomes 17

18 The primary outcome was the initial treatment strategy for acute appendicitis, defined as surgical or  
19 non-operative. Secondary outcomes related to patient management included number and proportion  
20 of operative cases performed open and laparoscopically, use of diagnostic imaging and variation in  
21 patient management over time, as the pandemic progressed. Other clinical outcomes were failure  
22 rate of non-operative treatment (defined as appendicectomy within initial hospital inpatient episode  
23 in a case in whom the initial treatment strategy was non-operative), need for hospital readmission,  
24 wound infection, bowel obstruction, intra-abdominal collection, further surgery or interventional  
25 radiology procedure, length of hospital stay and mortality. These outcomes were all reported to 30  
26 days following initial hospital admission and were selected as important outcomes from a core  
27 outcome set for paediatric appendicitis.[9]  
28  
29  
30  
31  
32  
33  
34  
35

## 36 37 Data collection and analysis 38

39 Anonymous data were collected by local study teams within each hospital and submitted to the study  
40 team monthly. Data were checked for duplication since we were aware that some cases were  
41 transferred from one hospital to another during the study period (typically from a district general  
42 hospital to a local specialist paediatric surgery centre) and we wished to avoid duplication. Duplicated  
43 data records were identified and excluded if all of age, sex, CRP and WCC at admission were identical.  
44  
45  
46  
47

48 Statistical analysis was performed using StataSE v15 (StataCorp LLC, Texas, USA) and the figures were  
49 produced using GraphPad Prism v8 (GraphPad Software, La Jolla California USA). Data are presented  
50 as median (IQR or range) and/or number/total (%) as appropriate. Fisher's exact test or chi-squared  
51 test, as appropriate, were used for comparison of categorical data and the Mann Whitney-U test was  
52 used for continuous data. A *p* value of less than 0.05 was considered as statistically significant. The  
53 study was conducted according to Strengthening the Reporting of Observational studies in  
54 Epidemiology (STROBE) guidelines for observational studies.[10]  
55  
56  
57  
58  
59  
60

## Patient and public involvement

Given the restrictions and need for rapid study commencement there was no active patient and public involvement in this study at this stage. There is no relevant patient group of to disseminate findings of this study to.

## Funding

The study did not receive any funding. The corresponding author had full access to all study data and responsibility for publication.

## Results

### Survey of surgeons who treat children

One hundred and one complete responses (75% specialist paediatric surgeons, 25% general surgeons) were received from surgeons at 19 district general hospitals and 26 specialist children's centres. One fifth of respondents (representing 60% of hospitals) had already experienced some change in their usual clinical management of children with appendicitis. The most frequent changes experienced were the use of non-operative treatment for uncomplicated acute appendicitis (63%), open (instead of laparoscopic) appendectomy for complicated appendicitis (37%), more frequent use of imaging to confirm diagnosis and greater use of oral rather than intravenous antibiotics (both 32%). In the majority of cases (95%) this change was an active individual surgeon or departmental decision.

Most respondents (87%) indicated they anticipated some change in the management pathway for these children, either in their diagnostic work-up, the type of treatment offered or that they would cease treating children with appendicitis altogether during the coronavirus pandemic (Table 1).

**Table 1: Anticipated future effect on management of children with appendicitis during coronavirus pandemic**

| Anticipated change                                                                                                             | GS, n=21 (%) | SPS, n=65 (%) |
|--------------------------------------------------------------------------------------------------------------------------------|--------------|---------------|
| <u>Simple appendicitis</u> : I will actively offer non-operative treatment to all children with simple appendicitis            | 15 (71)      | 45 (69)       |
| <u>Simple appendicitis</u> : I will consider non-operative treatment for children with simple appendicitis at parental request | 5 (24)       | 14 (22)       |

|                                                          |                                                                                                                                                          |         |         |
|----------------------------------------------------------|----------------------------------------------------------------------------------------------------------------------------------------------------------|---------|---------|
| 1<br>2<br>3<br>4<br>5<br>6<br>7<br>8<br>9                | Simple appendicitis: I will actively perform open (as opposed to laparoscopic) appendicectomy in children with simple appendicitis                       | 4 (19)  | 32 (49) |
| 10<br>11<br>12<br>13<br>14<br>15<br>16                   | Complicated appendicitis: I will actively offer non-operative treatment to children with complicated appendicitis                                        | 3 (14)  | 10 (15) |
| 17<br>18<br>19<br>20<br>21<br>22<br>23                   | Complicated appendicitis: I will consider non-operative treatment to children with complicated appendicitis at parental request                          | 6 (29)  | 11 (17) |
| 24<br>25<br>26<br>27<br>28<br>29<br>30<br>31<br>32<br>33 | Complicated appendicitis: I will actively perform open (as opposed to laparoscopic) appendicectomy in children with complicated appendicitis             | 12 (57) | 44 (68) |
| 34<br>35<br>36<br>37<br>38<br>39<br>40<br>41<br>42<br>43 | Complicated appendicitis: I will actively pursue a shorter than usual course of intravenous antibiotics in children with complicated appendicitis        | 5 (24)  | 9 (14)  |
| 44<br>45<br>46<br>47<br>48<br>49<br>50<br>51<br>52<br>53 | Appendix mass: I will actively offer non-operative treatment to children with appendix mass                                                              | 12 (57) | 26 (40) |
| 54<br>55<br>56<br>57<br>58<br>59<br>60                   | Appendix mass: I will consider non-operative treatment to children with appendix mass at parental request                                                | 4 (19)  | 6 (9)   |
|                                                          | Appendix mass: I will not offer routine interval appendicectomy in children who have had successful non-operative treatment of appendix mass             | 3 (14)  | 17 (26) |
|                                                          | Any appendicitis: Routine imaging for all cases of suspected appendicitis to be certain of diagnosis                                                     | 6 (29)  | 14 (22) |
|                                                          | Any appendicitis: CT scan instead of US for diagnosis of appendicitis                                                                                    | 0       | 0       |
|                                                          | Any appendicitis: More frequent use of imaging to guide management (e.g. select cases for non-operative treatment / reduce negative appendicectomy rate) | 13 (62) | 31 (48) |
|                                                          | Any appendicitis: consultant review for all cases prior to considering surgery                                                                           | 15 (71) | 46 (71) |
|                                                          | Any appendicitis: we will likely be sending children with appendicitis to another hospital for treatment                                                 | 3 (14)  | 1 (2)   |
|                                                          | Any appendicitis: we will likely be treating children at my hospital who would usually be treated somewhere else                                         | 0       | 33 (51) |

GS – general surgeons, SPS – specialist paediatric surgeons

## Observational cohort study - children included and radiological investigations

Data were submitted prior to the data cut-off date for this report for 838 children treated for appendicitis between April 1<sup>st</sup> and May 31<sup>st</sup> 2020 in 67 centres (approximately half of all centres who treat children with appendicitis in the UK). No duplicated records were identified so all are included.

The median age was 10 (range 1-15) years and 527 (63%) children were male. General surgeons

1  
2  
3 treated 343 (41%) of cases with the remaining 496 (59%) being treated by specialist paediatric  
4 surgeons. In this cohort of children treated for appendicitis, diagnostic imaging was used in 445 (53%)  
5 children with abdominal ultrasound and abdominal computed tomography (CT) scan undertaken in  
6 420 (50%) and 46 (5.5%) cases respectively. At the point of diagnosis 600 children (72%) were  
7 suspected by the treating surgeon to have simple acute appendicitis, 201 (24%) complicated  
8 appendicitis and 35 (4%) an appendix mass (data missing in 3 cases).  
9

10 At diagnosis of acute appendicitis the COVID-19 status was known positive in 4 (0.5%) children, known  
11 negative in 171 (20%) children, tested awaiting result in 397 (47%) children and 266 (32%) children  
12 were untested.  
13

### 14 Initial treatment strategy

15 Initial treatment strategy was non-operative in 326 (39%) children. In the 512 (61%) children treated  
16 initially with surgery, 262 (52%) had an open procedure and 243 (48%) an initially laparoscopic  
17 procedure (data on surgical approach not available for 7 cases). Initial treatment stratified by  
18 suspected severity of appendicitis at diagnosis is shown in Figure 1.  
19

20 Comparative clinical, laboratory and radiological details for cases treated surgically and non-  
21 operatively are shown in Table 2. Cases treated surgically typically had more advanced appendicitis  
22 with higher CRP and white cell count at diagnosis and were more likely to have suspected complicated  
23 (as opposed to simple) appendicitis. A higher proportion of cases treated non-operatively had an  
24 ultrasound scan than of cases treated surgically. Of cases suspected to be simple appendicitis 43%  
25 (259/600) were initially treated non-operatively compared to 20% (40/201) of cases suspected to be  
26 complicated appendicitis.  
27

28 For cases treated surgically with either open or laparoscopic appendicectomy, comparative clinical,  
29 laboratory and radiological details for are shown in Table 3. Overall 48% (n=243) of cases that were  
30 treated surgically underwent a laparoscopic procedure. There was no relationship identified between  
31 choice of procedure and suspected severity of appendicitis pre-operatively. Cases treated  
32 laparoscopically were older, more likely to be treated by a specialist paediatric surgeon and more likely  
33 to have had a diagnostic ultrasound than cases performed open. For both open and laparoscopic  
34 procedures surgeons tended to underestimate disease severity at diagnosis compared to the surgical  
35 findings (Table 3). The overall negative appendicectomy rate was 4.5% (n=23) in cases treated  
36 surgically.  
37  
38  
39  
40  
41  
42  
43  
44  
45  
46  
47  
48  
49  
50  
51  
52  
53  
54  
55  
56  
57  
58  
59  
60

## Change in initial treatment method during the pandemic

During the first week of April 2020 the proportion of cases initially treated non-operatively was 49% which reduced to 33% in the last week of May 2020, (Figure 1). Of those cases treated operatively, 79% were by open appendicectomy during the first week of April 2020 and this reduced to 41% in the last week of May 2020 (Figure 2).

### Figures

**Figure 1** Initial treatment stratified by suspected severity of appendicitis at diagnosis

\* Data on severity at diagnosis missing for 2 cases; both had non-operative treatment; § Data on surgical approach missing for 7 cases; NOT – non-operative treatment; Lap - laparoscopic

**Figure 2.** Initial management strategy of appendicitis by week, operative vs non-operative.

The red bars represent operative treatment and the blue bars represent non-operative treatment demonstrating a trend towards operative treatment over time.

**Figure 3.** Initial operative management strategy of appendicitis by week, open vs laparoscopic.

The red bars represent laparoscopic appendicectomy and the blue bars represent open appendicectomy demonstrating a trend towards laparoscopic appendicectomy over time.

**Table 2** Clinical, laboratory and radiological characteristics of cases treated initially non-operatively or operatively

|                              | Non-operative<br>(n= 326) | Operative<br>(n=512) | <i>p</i> |
|------------------------------|---------------------------|----------------------|----------|
| Age (years)                  | 10.5 (8-13)               | 10 (8-12)            | 0.19     |
| Male (n, %)                  | 195 (60)                  | 331 (65)             | 0.16     |
| Duration of symptoms (hours) | 36 (24-72)                | 48 (24-72)           | 0.58     |



|                                         |                           |                  |                  |         |
|-----------------------------------------|---------------------------|------------------|------------------|---------|
| Speciality (n, %)                       | GS                        | 140 (43)         | 202 (39)         | 0.35    |
|                                         | SPS                       | 186 (57)         | 310 (61)         |         |
| Admission bloods                        | WCC – x10 <sup>9</sup> /L | 14.4 (10.7-17.8) | 15.2 (12.0-18.5) | 0.01    |
|                                         | CRP - mg/L                | 32 (7.1-81)      | 52 (15-126)      | <0.0001 |
| US performed (n, %)                     |                           | 193 (59)         | 227 (44)         | <0.0001 |
| CT performed (n, %)                     |                           | 16 (4.9)         | 30 (5.9)         | 0.76    |
| Suspected severity at diagnosis (n, %)* | Simple                    | 259 (80)         | 341 (67)         | <0.0001 |
|                                         | Complicated               | 40 (12)          | 161 (31)         |         |
|                                         | Appendix mass             | 25 (7.7)         | 10 (2.0)         |         |
|                                         |                           |                  |                  |         |

\*For 2 cases suspected severity was missing; GS – general surgeon; SPS – specialist paediatric surgeon; WCC – white cell count; CRP – C-reactive protein; L – litre; mg – milligrams.

### Patient outcomes to 30-days

For 326 cases treated non-operatively, 81 (25%) children failed non-operative treatment during the initial admission. This failure rate in cases suspected to be simple appendicitis was 24% (62/259) and for those suspected to be complicated appendicitis was 30% (12/40). All these cases proceeded to appendicectomy which was approached via an open procedure in 35 (44%) cases and a laparoscopic procedure in 45 (56%) cases (data missing in 1 case). Where available (missing n=2), intra-operative findings in those who failed initial non-operative treatment were normal appendix in 4 (4.9%) children, simple appendicitis in 37 (47%) children, complicated appendicitis in 32 (41%) children and appendix mass in 6 (7.4%) children.

Overall, cases treated operatively had a longer length of initial inpatient stay compared to those treated initially non-operatively (3 [2-5] vs 2 [1-4] days,  $p < 0.0001$ ). Overall, the 30-day readmission rate was 12% (30/245) for non-operative treatment in those that were discharged home without an operation and 7.4% (38/512) in those treated initially with an operation. Reasons for readmission in cases treated operatively were abdominal collection/abscess (n=17), abdominal pain (n=11), fever (n=2), wound dehiscence/infection (n=6) and small bowel obstruction (n=1). Reasons for readmission in the group which underwent non-operative treatment without appendicectomy prior to discharge were abdominal collection/abscess (n=4), abdominal pain (n=20) and fever (n=4). Note that in some cases there were multiple reasons for readmission or the reason was not specified.

At 30-days there were no reported deaths. Children undergoing an open procedure had a similar rate of readmission (7 [n=19] vs 8% [n=19],  $p = 0.87$ ), wound infection (4 [n=10] vs 2% [n=4],  $p = 0.18$ ), bowel

obstruction (1 [n=2] vs 1% [n=3], p=0.68), intra-abdominal collection (8 [n=21] vs 10% [n=25], p=0.44) and re-operation (3 [n=8] vs 5% [n=13], p=0.27) to those who had a laparoscopic procedure. An open procedure was associated with a shorter length of inpatient stay compared to a laparoscopic procedure (2 [2-4] vs 3 [2-6], p=0.005). These outcomes are further stratified by severity of appendicitis in Table 4.

**Table 3 Clinical, laboratory and radiological characteristics of cases treated initially operatively stratified by open or laparoscopic procedure**

|                                          |                           | Open<br>(n=262)  | Laparoscopic<br>(n=243) | p      |
|------------------------------------------|---------------------------|------------------|-------------------------|--------|
| Age (years)                              |                           | 10 (7-12)        | 11 (9-13)               | 0.0004 |
| Male (n,%)                               |                           | 176 (67)         | 149 (61)                | 0.19   |
| Speciality (n,%)                         | GS                        | 119 (60)         | 81 (40)                 | 0.006  |
|                                          | SPS                       | 143 (47)         | 162 (53)                |        |
| Admission bloods                         | WCC – x10 <sup>9</sup> /L | 15.6 (12.3-18.6) | 14.9 (11.6-18.0)        | 0.34   |
|                                          | CRP - mg/L                | 52 (15-130)      | 52 (15-124)             | 0.91   |
| US performed (n,%)                       |                           | 101 (39)         | 122 (50)                | 0.009  |
| CT performed (n,%)                       |                           | 18 (6.8)         | 12 (4.9)                | 0.19   |
| Suspected severity pre-operatively (n,%) | Simple                    | 182 (69)         | 155 (64)                | 0.40   |
|                                          | Complicated               | 76 (29)          | 84 (35)                 |        |
|                                          | Appendix mass             | 4 (1.5)          | 4 (1.7)                 |        |
| Operative findings (n,%)                 | Normal                    | 13 (5.0)         | 10 (4.1)                | 0.66   |
|                                          | Mass                      | 7 (2.7)          | 8 (3.3)                 |        |
|                                          | Simple                    | 128 (49)         | 108 (44)                |        |
|                                          | Complicated               | 113 (43)         | 117 (48)                |        |

Data missing for 7 cases. GS – general surgeon; SPS – specialist paediatric surgeon; WCC – white cell count; CRP – C-reactive protein; L – litre; mg – milligrams.

Table 4 Comparative outcomes for cases treated initially operatively stratified by operative findings

| Table 4                                   | Simple or No appendicitis |                         |      | Complicated appendicitis or Appendix Mass |                         |       |
|-------------------------------------------|---------------------------|-------------------------|------|-------------------------------------------|-------------------------|-------|
|                                           | Open<br>(n=141)           | Laparoscopic<br>(n=118) | p    | Open<br>(n=120)                           | Laparoscopic<br>(n=125) | p     |
| Readmission (n, %)                        | 4 (2.8)                   | 4 (3.4)                 | 1.00 | 15 (13)                                   | 15 (12)                 | 1.00  |
| Wound infection (n, %)                    | 0 (0)                     | 2 (1.7)                 | 0.21 | 10 (8.3)                                  | 2 (1.6)                 | 0.02  |
| Bowel obstruction (n, %)                  | 0 (0)                     | 0 (0)                   | 1.00 | 2 (1.7)                                   | 3 (2.4)                 | 1.00  |
| Intra-abdominal collection/abscess (n, %) | 4 (2.8)                   | 2 (1.7)                 | 0.69 | 17 (14)                                   | 23 (18)                 | 0.39  |
| Reoperation /IR procedure (n, %)          | 1 (0.7)                   | 0 (0)                   | 1.00 | 7 (5.8)                                   | 13 (10)                 | 0.25  |
| Length of stay (days, median and IQR)     | 2 (1-3)                   | 2 (1-3)                 | 0.33 | 4 (2-6)                                   | 6 (4-8)                 | 0.001 |

IR – interventional radiology

## Discussion

This report confirms anecdotal suspicion that the management of children with appendicitis has been significantly changed during the coronavirus pandemic with a clear shift towards non-operative management and towards open appendicectomy in cases managed surgically. Although we do not present here any comparative data to a different time period, the use of non-operative treatment for children with acute appendicitis was extremely limited in a survey performed in 2018[3] and anecdotally we do not believe there has been a significant change in practice prior to the start of the pandemic. The fact that overall just under 40% of children with suspected appendicitis were treated initially non-operatively represents a huge change in practice. This change was seen from early in the pandemic as reported in our initial survey and was anticipated by the majority of survey respondents. A small number of recent reports suggest that such changes in the management of appendicitis are not unique to the UK but have been implemented in a number of countries.[11-13]

Interestingly over the course of this data collection period the proportion of cases undergoing non-operative management decreased and the proportion of cases treated surgically having a laparoscopic procedure increased over time. We suspect this pattern is a reflection of initial guidance from

1  
2  
3 professional bodies proposing non-surgical treatments be sought wherever possible and cautioning  
4 against the use of laparoscopy.[5] Subsequent evolution of that guidance over time may have  
5 encouraged surgeons to resume their normal practice. We intend to monitor surgical practice longer  
6 term during the pandemic to identify any further changes in management.  
7  
8  
9

10 The sudden widespread uptake of non-operative treatment of appendicitis seen to date during the  
11 pandemic presents an opportunity to evaluate non-operative treatment in a real world setting across  
12 multiple centres in a way that until recently would not have been imagined possible. These early data  
13 suggest that non-operative treatment of acute appendicitis is effective and safe in a real-world setting.  
14 Further work is needed however, to determine whether the outcomes from non-operative  
15 management are acceptable to children with appendicitis, their parents and other stakeholders  
16 including surgeons. Cases treated non-operatively achieved a shorter length of stay than cases treated  
17 surgically, there were no deaths and the adverse event profile of each treatment approach was similar.  
18 These data suggest that surgeons selected less severe cases for non-operative treatment despite no  
19 formal guidelines existing for this purpose. Yet it remains likely that non-operative treatment has been  
20 used here outside the criteria used to date in formal research studies in which it has been  
21 evaluated.[14-16] Of note 12% of cases in which non-operative treatment was used as first line  
22 therapy were suspected to be complicated appendicitis.  
23  
24  
25  
26  
27  
28  
29  
30  
31  
32

33 Both open and laparoscopic appendicectomy are recognised to be safe and effective treatments for  
34 children with appendicitis although there has been increased uptake of laparoscopic appendicectomy  
35 in children in the UK in recent years.[17] The reversal of this trend during the pandemic such that just  
36 48% of all cases treated surgically were performed laparoscopically is likely in response to guidance  
37 from professional bodies that laparoscopy may increase the risk of SARS-CoV-2 transmission in  
38 positive cases.[4] Anecdotally we are aware that a move away from laparoscopy has been  
39 implemented by some individual surgeons and also by some institutions. The trend towards a higher  
40 proportion of cases being performed laparoscopically over time (Figure 2) is consistent with updated  
41 guidance from professional bodies and a greater understanding about the epidemiology of COVID-19  
42 in children[7].  
43  
44  
45  
46  
47  
48  
49

50 Recently the high negative appendicectomy rate observed in the UK (15.9% in children) has been  
51 highlighted and achieved significant public interest.[18, 19] It is therefore of particular note that the  
52 negative appendicectomy rate seen in this dataset is extremely low, and in fact one of the lowest rates  
53 reported in the UK to date[1, 18, 20]. The caveat to this, however, is that we have reported  
54 intraoperative findings rather than histological findings and the rate based on histology may in fact be  
55 higher. Alongside this, radiological imaging (both US and CT) has been seen more frequently during  
56  
57  
58  
59  
60

1  
2  
3 the period of the pandemic than in a published national dataset (53% vs 41%) [18]. It is not clear  
4 whether increasing use of imaging has resulted in such a low negative appendicectomy rate but it is  
5 certainly a possibility. Other factors may also be contributory however, including increased use of non-  
6 operative treatment and potentially increased consultant involvement in decision making. Given cases  
7 have been selected for non-operative treatment by clinicians, it is possible that some children who  
8 would have otherwise undergone negative appendicectomy were selected for non-operative  
9 treatment instead. Although we do not have data on consultant involvement in decision making on a  
10 case by case basis within this dataset, just over 70% of consultants anticipated there would be greater  
11 consultant involvement in management of children with appendicitis in the survey undertaken at the  
12 beginning of the pandemic. This is certainly an area worthy of further investigation since a reduction  
13 in the negative appendicectomy rate may be seen as an unanticipated benefit that it would be  
14 beneficial to maintain in the longer term. The COVID-19 pandemic may inadvertently be presenting  
15 opportunities for quality improvement that should be realised beyond the period of the pandemic  
16 itself.

17  
18  
19  
20  
21  
22  
23  
24  
25  
26  
27 The strengths of this study are that data have been collected prospectively from multiple centres,  
28 including representation from all nations, across the United Kingdom and Ireland. We deliberately did  
29 not involve other international centres so as to achieve a region across which there is relative  
30 consistency in management of children with appendicitis. This early analysis has been performed  
31 following a change in surgical practice to inform ongoing management during the pandemic and in the  
32 event of a second wave. The findings are likely generalisable to other countries in whom management  
33 is similar to that in the United Kingdom and Ireland. As a pragmatic real world study it provides an  
34 overview of real life outcomes outside the confines that would typically be achieved in a clinical trial.  
35 Conversely some may view this pragmatism as a limitation since we have not used precise definitions  
36 for severity of appendicitis nor have we proposed criteria for different treatment strategies. An  
37 additional limitation of any study looking at non operative treatment of appendicitis is that we cannot  
38 be sure whether those who underwent non operative treatment definitely had appendicitis. Whilst  
39 any such resulting 'over-treatment' may be viewed by some as regrettable, the risk/benefit profile of  
40 these two treatments is likely to be in favour of non-operative treatment over unnecessary operation  
41 for the majority of cases. However, improved positive identification of cases with appendicitis should  
42 remain the goal so that only children who truly have appendicitis receive treatment for it. A further  
43 limitation on terms of assessing the outcomes following non-operative treatment is that we have only  
44 reported outcomes to 30 days. We plan further analysis of a larger patient cohort to include longer  
45 term follow-up particularly of the group of children managed thus far without surgery. Finally, it is  
46 conceivable that the initial survey raised awareness of the use of alternative management strategies

1  
2  
3 and may in itself have influenced practice, although 95% of respondents stated that an active decision  
4 was being made suggesting this is unlikely for the majority.  
5  
6

7 In conclusion we present evidence that the COVID-19 pandemic has had a marked impact on the  
8 management of children with appendicitis with clear shifts towards increased use of non-operative  
9 treatment and open (as opposed to laparoscopic) appendicectomy. Despite the absence of formal  
10 guidelines, non-operative treatment appears safe and effective in children who have been selected  
11 for this treatment modality. Overall these data should reassure surgeons about management strategy  
12 used during the pandemic in the face of restrictions to normal surgical services and may inform best  
13 practice in future times of limited surgical capacity.  
14  
15  
16  
17  
18  
19  
20  
21

## 22 CASCADE study steering and writing group:

23  
24  
25 George S Bethell (Southampton Children's Hospital and University of Southampton, Southampton,  
26 UK), Clare M Rees (Imperial College Healthcare NHS Trust, London, UK), Jonathan Sutcliffe (Leeds  
27 Teaching Hospitals NHS Trust, Leeds, UK), Nigel J Hall (Southampton Children's Hospital and University  
28 of Southampton, Southampton, UK)  
29  
30  
31  
32  
33  
34  
35

## 36 Collaborators

37  
38 Anna-May Long, Florin Djendov, Victor Emordi, Cambridge University Hospitals; Mark Peter, Sarah  
39 Staight, Andrew Jackson, Huddersfield Royal Infirmary; Stewart Cleeve, Arun Kelay, Royal London  
40 Hospital; Michael Terry, Christina Major, Oscar Croysdale, Mike Nelson, St Mary's Hospital; Eleri  
41 Cusick, Hannah Rhodes, Juliette King, Sophie Lewis, Bristol Children's Hospital; Chris Driver, Gillian  
42 Winter, Royal Aberdeen Children's Hospital; Michael Wilson, Forth Valley Royal Hospital; Selena  
43 Curkovic, Raef Jackson, Bhushanrao Jadhav, University Hospital of Wales; Thomas Raymond, Vijay  
44 Gangalam, Deepak Selvakumar, Thomas Raymond, Royal Lancaster Infirmary; Khalid Elmalik, Reda  
45 Habak, Muslim Abdullah, Mohamed Ahmed Osama, Leicester Royal Infirmary; Milan Gopal, Laura  
46 Phillips, Khlud Asanai, Hany Gabra, Great North Children's hospital; Noman Zafar, Sophia Lewis,  
47 Florence Kashora, Dixa Thakrar, Northwick Park Hospital; Dean Rex, Annita Budzanowski, St George's  
48 Hospital; Jennifer Binnington, Simon Timbrell, Megan Ridgeway, East Lancashire Hospital NHS trust;  
49 Shirley Chan, Amani Asour, Adetayo Aderombi, Medway Maritime Hospital; Donald Menzies, Ali  
50 Murtada, Corina Dragu, Vincent Quan, Colchester Hospital; Alan Askari, Krashna Patel, Luton and  
51 Dunstable University Hospital; Merrill McHoney, Hetal Patel, Sesi Hotonu, Ashley Meikle, Royal  
52  
53  
54  
55  
56  
57  
58  
59  
60

1  
2  
3 Hospital for Children, Edinburgh; Andrew Beamish, Royal Gwent Hospital, Newport; Ajay Belgaumkar,  
4 Bankole Oyewole, Prabhat Narayan, Surrey and Sussex Healthcare NHS Trust; Marianne Hollyman,  
5 Angeliki Kosti, Thomas Badenoch, Musgrove Park Hospital; Frances Goulder, Katie Siggins, Kizzie  
6 Peters, Fiona Kirkham, Royal Hampshire County Hospital, Winchester; Paul Froggatt, Karen Lai, Cristina  
7 Navarro, Dorinda Chandrabose, Poole Hospital; Simon Toh, Portsmouth Hospital NHS Trust; Ingo  
8 Jester, Ben Martin, Birmingham Women's and Children's Hospital; Elizabeth Gemmill, King's Mill  
9 Hospital; Richard Egan, Keira Lily, Morrision, Swansea; Mark Dilworth, Dimitrios Stamatiou,  
10 Birmingham Heartlands Hospital; Alasdair Macmillan, Joshua McIntyre, Danielle Clyde, Majid Rashid,  
11 Victoria Hospital Kirkcaldy; Gandrapu Srinivas, Torbay Hospital, Torquay Hospital; Katherine Buckley,  
12 Darren Smith, Wirral University Teaching Hospital NHS Trust; Henry Dowson, Gautam Singh, Frimley  
13 Park Hospital; Seshu Kumar Bylapudi, Milton Keynes University Hospital; Louise Phillips, Kimberley  
14 Hallam, Marisa Clemente, Tanzeela Gala, Glan Clwyd Hospital; Karol Pal, Borders General Hospital,  
15 Melrose; George Ninkovic-Hall, Emila Paul, Leighton Hospital; Theo Pelly, Joe Vance-Daniel, Kingston  
16 Hospital; Venkatesh Kanakala, Edward J Nevins, James Dixon, Michael John, James Cook University  
17 hospital; Jude Prince, Dale Vimalachandran, Countess of Chester NHS Foundation Trust; Georgios  
18 Karagiannidis, Ipswich Hospital NHS Trust; Suzette Samlalsingh, Chrsitine Ozone, Amina Bouhelal,  
19 Queen's Hospital, Barking, Havering and Redbridge University Hospitals NHS Trust; Siddhartha Handa,  
20 Furness General Hospital; Andrew Mitchell, Sathasivam Rajeev, Ellen Ross, Ali Wadah, Darlington  
21 Memorial Hospital; Tim Bradnock, John Hallett, Aileen Rooney, Royal Hospital for Children, Glasgow;  
22 Shirish Tewari, Vinay Shah, Vivek Gupta, Nick Reay-Jones, Lister Hospital; Salman Bodla, Nuha Yassin,  
23 New Cross Hospital Wolverhampton; Harriet Corbett, Sumita Chhabra, Alder Hey Children's Hospital;  
24 Athanasios Tyraskis, Benjamin Allin, Angus Fitchie, Oxford University Hospital Trust; Michael Stanton,  
25 Dina Fouad, Southampton Children's Hospital; Mark Vipond, Harry Dean, Matthew Boal, Oliver Brown,  
26 Gloucestershire Royal Hospital; Jonathan Goring, Mahmoud Marei, Christian Verhoef, Jonathan  
27 Ducey, Royal Manchester Childrens Hospital; Clare Rees, Chipo Mushonga, Dan Frith, Imperial College  
28 Healthcare NHS Trust; Ashok Ram, Tristan Boam, Melissa Gabriel, Ferzine Mohamed, Norfolk and  
29 Norwich University Hospital; David Williams, Katie Cross, Nadine Dyar, Rick MacMahon, Mohammed  
30 Fakhurul-Aldeen, Iain Bain, David Bunting, North Devon District Hospital; Graham Branagan, Rachel  
31 Carten, Chee Wan Lai, Lydia Longstaff, Salisbury Hospital; Anindya Niyogi, Claudia Koh, Michael John,  
32 Christian Fox, Nottingham Children's Hospital; Stavros Loukogeorgakis, Joe Curry, Kate Cross, Jayaram  
33 Sivaraj, Great Ormond Street Hospital; Sean Marven, Milda Jancauskaite, Helen Please, Wayne  
34 Fradley, Sheffield Childrens Hospital; Fenella Welsh, Maki Jitsumara, Basingstoke Hospital; Sinead  
35 Hassett, Ancuta Muntean, Ionica Stoica, Sarah Yassin, Children's Health Ireland, Crumlin; Suzanne  
36 Lawther, David Colvin, Ciaran Durand, Royal Belfast Hospital for Sick Children; Mohamed Eltom, Hull  
37  
38  
39  
40  
41  
42  
43  
44  
45  
46  
47  
48  
49  
50  
51  
52  
53  
54  
55  
56  
57  
58  
59  
60



University Teaching Hospital; Iain Yardley, Kirsty Brennan, Clara Chong, Evelina Hospital; Hasan Mukhtar, Hany Khalil, Stephanie Clark, Whittington Health NHS trust; Ashish Desai, Ben Woodward, Kings College Hospital; Amulya Saxena, Joshua Cave, Chelsea and Westminster Hospital; Alistair Sharples, University Hospitals of North Midlands.

## References

1. Giuliani S, Cecil EV, Apelt N, Sharland M, Saxena S. Pediatric Emergency Appendectomy and 30-Day Postoperative Outcomes in District General Hospitals and Specialist Pediatric Surgical Centers in England, April 2001 to March 2012: Retrospective Cohort Study. *Ann Surg*. 2016;263(1):184-90.
2. Di Saverio S, Podda M, De Simone B, Ceresoli M, Augustin G, Gori A, et al. Diagnosis and treatment of acute appendicitis: 2020 update of the WSES Jerusalem guidelines. *World Journal of Emergency Surgery*. 2020;15(1):27.
3. Hall NJ. CONservative TRreatment of Appendicitis in Children a randomised controlled Trial CONTRACT (Feasibility study). *health technol Assess* 2020;in press.
4. De Simone B, Chouillard E, Di Saverio S, Pagani L, Sartelli M, Biffi WL, et al. Emergency surgery during the COVID-19 pandemic: what you need to know for practice. *Ann R Coll Surg Engl*. 2020;102(5):323-32.
5. S H, D D. Joint guidance for surgeons: guidance for surgeons working during the COVID-19 pandemic from the Surgical Royal Colleges of the United Kingdom and Ireland. Royal College of Surgeons of England. <https://www.rcseng.ac.uk/coronavirus/joint-guidance-for-surgeons-v1/2020>.
6. Collaborative C. Mortality and pulmonary complications in patients undergoing surgery with perioperative SARS-CoV-2 infection: an international cohort study. *Lancet*. 2020;396(10243):27-38.
7. Munro AR, D. THE MISSING LINK? CHILDREN AND TRANSMISSION OF SARS-COV-2 2020 [Available from: <https://dontforgetthebubbles.com/the-missing-link-children-and-transmission-of-sars-cov-2/>].
8. Harris PA, Taylor R, Thielke R, Payne J, Gonzalez N, Conde JG. Research electronic data capture (REDCap)--a metadata-driven methodology and workflow process for providing translational research informatics support. *J Biomed Inform*. 2009;42(2):377-81.
9. Sherratt FC, Allin BSR, Kirkham JJ, Walker E, Young B, Wood W, et al. Core outcome set for uncomplicated acute appendicitis in children and young people. *Br J Surg*. 2020.
10. von EE, Altman DG, Egger M, Pocock SJ, Gotsche PC, Vandenbroucke JP. The Strengthening the Reporting of Observational Studies in Epidemiology (STROBE) statement: guidelines for reporting observational studies. *J Clin Epidemiol*. 2008;61(4):344-9.
11. Saleem A, Sajid MI, Arshad M. Acute appendicitis during SARS-CoV-2: A brief communication of patients and changes in clinical practice from a single institute in Pakistan. *J Pediatr Surg*. 2020.
12. Ogundele IO, Alakaloko FM, Nwokoro CC, Ameh EA. Early impact of COVID-19 pandemic on paediatric surgical practice in Nigeria: a national survey of paediatric surgeons. *BMJ Paediatrics Open*. 2020;4(1):e000732.
13. Nasher O, Sutcliffe JR, Stewart RJ. Pediatric Surgery during the COVID-19 Pandemic: An International Survey of Current Practice. *Eur J Pediatr Surg*. 2020.
14. Minneci PC, Mahida JB, Lodwick DL, Sulkowski JP, Nacion KM, Cooper JN, et al. Effectiveness of Patient Choice in Nonoperative vs Surgical Management of Pediatric Uncomplicated Acute Appendicitis. *JAMA Surg*. 2015:1-8.
15. Armstrong J, Merritt N, Jones S, Scott L, Butter A. Non-operative management of early, acute appendicitis in children: is it safe and effective? *J Pediatr Surg*. 2014;49(5):782-5.
16. Gorter RR, van der Lee JH, Cense HA, Kneepkens CM, Wijnen MH, In 't Hof KH, et al. Initial antibiotic treatment for acute simple appendicitis in children is safe: Short-term results from a multicenter, prospective cohort study. *Surgery*. 2015;157(5):916-23.



- 1  
2  
3 17. Bethell G, Adams S, Johnson T, Hall N, Stanton M. Laparoscopy uptake for paediatric  
4 appendicectomy – a comparison of adult general surgeons vs paediatric surgeons  
5 in England from 1997 to 2015. 66<sup>th</sup> British Association of Paediatric Surgeons Annual  
6 International Congress; Nottingham, UK. 2019.  
7  
8  
9 18. Collaborative RSGobotWMR. Appendicitis risk prediction models in children presenting with  
10 right iliac fossa pain (RIFT study): a prospective, multicentre validation study. Lancet Child Adolesc  
11 Health. 2020;4(4):271-80.  
12  
13 19. Donnelly L. Women needlessly having their appendix out in almost one in three cases. The  
14 Daily Telegraph. 2019.  
15  
16 20. Tiboni S, Bhangu A, Hall NJ. Outcome of appendicectomy in children performed in paediatric  
17 surgery units compared with general surgery units. Br J Surg. 2014;101(6):707-14.  
18  
19  
20  
21  
22  
23  
24  
25  
26  
27  
28  
29  
30  
31  
32  
33  
34  
35  
36  
37  
38  
39  
40  
41  
42  
43  
44  
45  
46  
47  
48  
49  
50  
51  
52  
53  
54  
55  
56  
57  
58  
59  
60

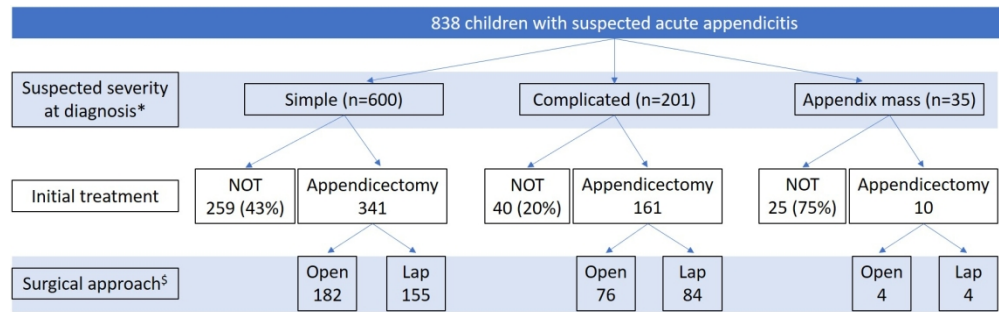

514x161mm (96 x 96 DPI)

1  
2  
3  
4  
5  
6  
7  
8  
9  
10  
11  
12  
13  
14  
15  
16  
17  
18  
19  
20  
21  
22  
23  
24  
25  
26  
27  
28  
29  
30  
31  
32  
33  
34  
35  
36  
37  
38  
39  
40  
41  
42  
43  
44  
45  
46  
47  
48  
49  
50  
51  
52  
53  
54  
55  
56  
57  
58  
59  
60

### Initial Management of Suspected Appendicitis Operative vs non-operative per week

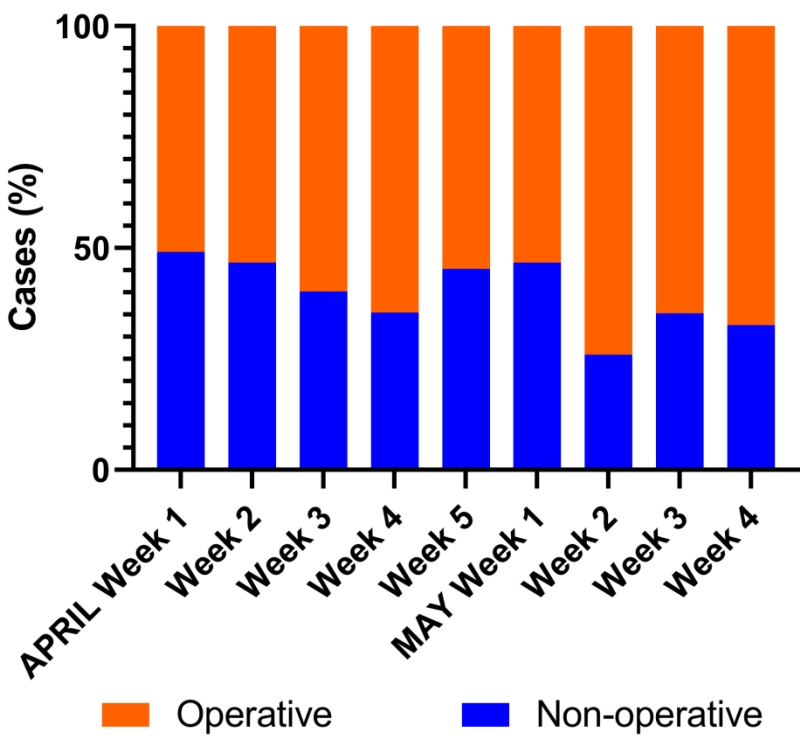

114x105mm (600 x 600 DPI)

## Initial Management of Suspected Appendicitis Open vs Laparoscopic per week

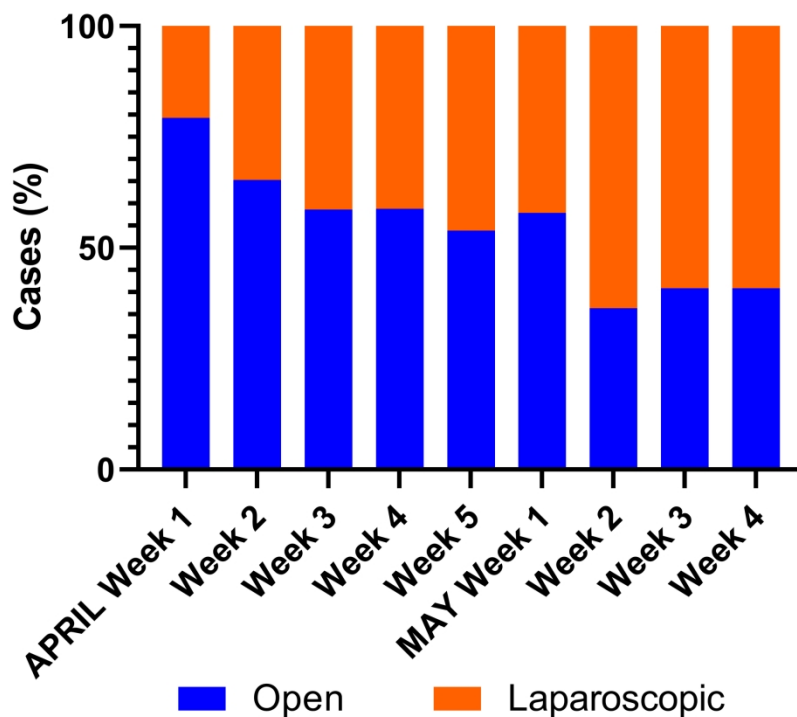

114x103mm (600 x 600 DPI)

# Children with Appendicitis during the Coronavirus pandemic (CASCADE)

The current coronavirus pandemic is placing NHS services in an unprecedented situation and there will be impact on the delivery of care for non-coronavirus patients. Guidance from the Royal Colleges recommends change in standard surgical treatment pathways. Clinicians may decide or be encouraged to consider treating some conditions differently to their usual practice. This will certainly have an impact on practice and may influence outcomes.

The management of children with acute appendicitis is one such condition. A number of different treatment options exist and current pathways may well be changed in some centres.

This CASCADE study has been set-up to capture data relating to this.

This initial survey aims to capture the current and anticipated impact of the coronavirus pandemic on treatment of children with acute appendicitis. It comprises just 4 questions and should take no more than 5 minutes to complete.

It is for completion by consultants only please. This is not because we don't value the views of trainees but in this particular instance we feel that consultants are more likely than ever going to be making decisions.

We will generate a rapid summary of the data in order to provide you with an overview of how practice is changing across the country and to share ideas for change that are considered useful.

All responses will be treated anonymously. Please complete the entire survey for your responses to be saved.

## Definitions

For the purposes of the questions that follow please use the following definitions:

**SIMPLE APPENDICITIS:** a child with a presumed clinical or radiological diagnosis of simple appendicitis.

**COMPLICATED APPENDICITIS:** a child with a presumed clinical or radiological diagnosis of complicated appendicitis (comprising anything other than simple appendicitis but not an appendix mass).

**APPENDIX MASS:** a child that has a presumed clinical or radiological diagnosis of an appendix mass.

We appreciate it is not always possible to make an accurate distinction between these groups but please answer the questions the best you can according to these definitions.

**Question 1**

In the past 2 weeks have you managed a child with acute appendicitis differently to your usual practice as a result of the coronavirus pandemic?

- Yes  
 No

In what way was your management of SIMPLE APPENDICITIS different to your usual practice?

- Simple appendicitis: used non-operative treatment as opposed to appendicectomy  
 Simple appendicitis: used enteral antibiotics or shorter course of IV if managing conservatively  
 Simple appendicitis: longer delay than usual in gaining access to operating theatre  
 Simple appendicitis: used open approach in place of laparoscopy  
(Tick all that apply)

In what way was your management of COMPLICATED APPENDICITIS different to your usual practice?

- Complicated appendicitis: used non-operative treatment as opposed to appendicectomy  
 Complicated appendicitis: earlier switch to oral antibiotics  
 Complicated appendicitis: longer delay than usual in gaining access to operating theatre  
 Complicated appendicitis: used open approach in place of laparoscopy  
 Appendix mass: non-operative treatment as opposed to appendicectomy  
 Appendix mass: no offer of interval appendicectomy as opposed to routine offering of interval appendicectomy  
(Tick all that apply)

In what way were these GENERAL ASPECTS OF MANAGEMENT different?

- Any appendicitis: routine imaging for all to be certain of diagnosis  
 Any appendicitis: CT instead of US (including use of chest CT or to protect staff)  
 Any appendicitis: transfer of a child to our hospital for treatment when that treatment would usually be provided at local hospital  
(Tick all that apply)

Was this different management brought about:

- as an active decision by you / your department  
 as a passive decision due to different resource availability (e.g. you could not get a child to surgery and they got better on antibiotics)  
 on the instruction of your department / institution / NHSE  
 instigated by the parents  
(Tick all that apply)

**Question 2**

Thinking ahead and given what you currently know about the likely effect the coronavirus pandemic will have, please indicate if you anticipate that you will manage children with acute appendicitis differently compared to your usual practice DURING the pandemic (for example you may be considering different thresholds for imaging, or the use of non-operative treatment in place of appendicectomy).

- Yes - differently
- No - usual practice

If yes, in what way do you currently anticipate there will be differences for children with SIMPLE APPENDICITIS?

Please only tick the box if you anticipate your management will be different to your usual practice for the specific clinical situation listed.

- Simple appendicitis: I will actively offer non-operative treatment to all children with simple appendicitis
- Simple appendicitis: I will consider non-operative treatment for children with simple appendicitis at parental request
- Simple appendicitis: I will actively perform open (as opposed to laparoscopic) appendicectomy in children with simple appendicitis  
(Tick all that apply)

If yes, in what way do you currently anticipate there will be differences for children with COMPLICATED APPENDICITIS?

Please only tick the box if you anticipate your management will be different to your usual practice for the specific clinical situation listed.

- Complicated appendicitis: I will actively offer non-operative treatment to children with complicated appendicitis
- Complicated appendicitis: I will consider non-operative treatment to children with complicated appendicitis at parental request
- Complicated appendicitis: I will actively perform open (as opposed to laparoscopic) appendicectomy in children with complicated appendicitis
- Complicated appendicitis: I will actively pursue a shorter than usual course of intravenous antibiotics in children with complicated appendicitis
- Appendix mass: I will actively offer non-operative treatment to children with appendix mass
- Appendix mass: I will consider non-operative treatment to children with appendix mass at parental request
- Appendix mass: I will not offer routine interval appendicectomy in children who have had successful non-operative treatment of appendix mass  
(Tick all that apply)

1 If yes, in what way do you currently anticipate there  
2 will be differences in the GENERAL MANAGEMENT of  
3 children with appendicitis?  
4

5 Please only tick the box if you anticipate your  
6 management will be different to your usual practice  
7 for the specific clinical situation listed.  
8  
9  
10  
11  
12  
13  
14  
15  
16  
17  
18  
19  
20  
21  
22  
23  
24  
25  
26  
27  
28  
29  
30  
31  
32  
33  
34  
35  
36  
37  
38  
39  
40  
41  
42  
43  
44  
45  
46  
47  
48  
49  
50  
51  
52  
53  
54  
55  
56  
57  
58  
59  
60

- Any appendicitis: Routine imaging for all cases of suspected appendicitis to be certain of diagnosis
  - Any appendicitis: CT scan instead of US for diagnosis of appendicitis
  - Any appendicitis: More frequent use of imaging to guide management (e.g. select cases for non-operative treatment / reduce negative appendicectomy rate)
  - Any appendicitis: consultant review for all cases prior to considering surgery
  - Any appendicitis: we will likely be sending children with appendicitis to another hospital for treatment
  - Any appendicitis: we will likely be treating children at my hospital who would usually be treated somewhere else
- (Tick all that apply)

Confidential: For Review Only



1  
2  
3  
4  
5  
6  
7  
8  
9  
10  
11  
12  
13  
14  
15  
16  
17  
18  
19  
20  
21  
22  
23  
24  
25  
26  
27  
28  
29  
30  
31  
32  
33  
34  
35  
36  
37  
38  
39  
40  
41  
42  
43  
44  
45  
46  
47  
48  
49  
50  
51  
52  
53  
54  
55  
56  
57  
58  
59  
60

**Question 3**

Thus far during this pandemic, has your department or your institution made any decisions or placed any restrictions on you that you feel will influence how you manage children with acute appendicitis that are not included in responses to the questions above

Yes  
 No

Please describe

\_\_\_\_\_

Confidential: For Review Only

1  
2  
3  
4  
5  
6  
7  
8  
9  
10  
11  
12  
13  
14  
15  
16  
17  
18  
19  
20  
21  
22  
23  
24  
25  
26  
27  
28  
29  
30  
31  
32  
33  
34  
35  
36  
37  
38  
39  
40  
41  
42  
43  
44  
45  
46  
47  
48  
49  
50  
51  
52  
53  
54  
55  
56  
57  
58  
59  
60

**Question 4**

Do you have any suggestions for practice change during the pandemic in relation to acute appendicitis that you wish to share? These may be useful to help other institutions manage children with appendicitis.

---

Any suggestions will be treated anonymously.

Confidential: For Review Only

1 **Last page**

2  
3 In order to ensure that we send you a copy of the  
4 rapid summary findings of this survey, please  
5 provide your email address.

(Whilst this is optional it would be really great  
if as many people as possible would be willing to  
complete a survey later in the year so we can  
maximise the opportunities for learning.)

6 We will also send you a link to the survey at the end  
7 of the pandemic so we can understand the impact  
8 better.  
9

10  
11  
12  
13 Please enter the name of the institution at which you  
14 work (this is just so we can identify responses from  
15 the same centre) \_\_\_\_\_

16  
17 Are you a

- General Surgeon  
 Specialist Paediatric Surgeon

18  
19  
20 If you wish to receive acknowledgement of your  
21 participation in this national survey please provide  
22 your name. \_\_\_\_\_  
23  
24  
25  
26  
27  
28  
29  
30  
31  
32  
33  
34  
35  
36  
37  
38  
39  
40  
41  
42  
43  
44  
45  
46  
47  
48  
49  
50  
51  
52  
53  
54  
55  
56  
57  
58  
59  
60

# BMJ Paediatrics Open

## Management and early outcomes of children with appendicitis in the UK and Ireland during the COVID-19 pandemic: a survey of surgeons and observational study

|                               |                                                                                                                                                                                                                                                                          |
|-------------------------------|--------------------------------------------------------------------------------------------------------------------------------------------------------------------------------------------------------------------------------------------------------------------------|
| Journal:                      | <i>BMJ Paediatrics Open</i>                                                                                                                                                                                                                                              |
| Manuscript ID                 | bmjpo-2020-000831.R2                                                                                                                                                                                                                                                     |
| Article Type:                 | Original research                                                                                                                                                                                                                                                        |
| Date Submitted by the Author: | 25-Sep-2020                                                                                                                                                                                                                                                              |
| Complete List of Authors:     | Bethell, George; University of Southampton Faculty of Medicine, University Surgical Unit<br>Rees, Clare; Imperial College Healthcare NHS Trust<br>Sutcliffe, Jonathan; Leeds Teaching Hospitals NHS Trust<br>Hall, Nigel; University of Southampton, Faculty of Medicine |
| Keywords:                     | Gastroenterology                                                                                                                                                                                                                                                         |
|                               |                                                                                                                                                                                                                                                                          |

SCHOLARONE™  
Manuscripts



I, the Submitting Author has the right to grant and does grant on behalf of all authors of the Work (as defined in the below author licence), an exclusive licence and/or a non-exclusive licence for contributions from authors who are: i) UK Crown employees; ii) where BMJ has agreed a CC-BY licence shall apply, and/or iii) in accordance with the terms applicable for US Federal Government officers or employees acting as part of their official duties; on a worldwide, perpetual, irrevocable, royalty-free basis to BMJ Publishing Group Ltd ("BMJ") its licensees and where the relevant Journal is co-owned by BMJ to the co-owners of the Journal, to publish the Work in this journal and any other BMJ products and to exploit all rights, as set out in our [licence](#).

The Submitting Author accepts and understands that any supply made under these terms is made by BMJ to the Submitting Author unless you are acting as an employee on behalf of your employer or a postgraduate student of an affiliated institution which is paying any applicable article publishing charge ("APC") for Open Access articles. Where the Submitting Author wishes to make the Work available on an Open Access basis (and intends to pay the relevant APC), the terms of reuse of such Open Access shall be governed by a Creative Commons licence – details of these licences and which [Creative Commons](#) licence will apply to this Work are set out in our licence referred to above.

Other than as permitted in any relevant BMJ Author's Self Archiving Policies, I confirm this Work has not been accepted for publication elsewhere, is not being considered for publication elsewhere and does not duplicate material already published. I confirm all authors consent to publication of this Work and authorise the granting of this licence.

# Management and early outcomes of children with appendicitis in the UK and Ireland during the COVID-19 pandemic: a survey of surgeons and observational study

## *CASCADE study collaborators*

Members of the CASCADE study collaborators group are listed in the Acknowledgement section.

The Corresponding Author has the right to grant on behalf of all authors and does grant on behalf of all authors, an exclusive licence (or non exclusive for government employees) on a worldwide basis to the BMJ Publishing Group Ltd to permit this article (if accepted) to be published in BMJ editions and any other BMJ PGL products and sublicences such use and exploit all subsidiary rights, as set out in our licence."

**Competing interests statement** - All authors have completed the Unified Competing Interest form (available on request from the corresponding author) and declare: no support from any organisation for the submitted work; no financial relationships with any organisations that might have an interest in the submitted work in the previous three years, no other relationships or activities that could appear to have influenced the submitted work.

**Data sharing statement** – Reasonable requests of relevant data will be considered.

**Contributorship statement** - Conception or design of the work – GB, CR, JS, NH. Data collection – CASCADE study collaborators. Data analysis and interpretation - GB, NH. Drafting the article – GB. Critical revision of the article – NH. Final approval of the version to be published - GB, CR, JS, NH.

## **Corresponding author and guarantor:**

Nigel J Hall  
University Surgical Unit  
Faculty of Medicine  
University of Southampton  
Tremona Road  
Southampton  
SO16 6YD  
[n.j.hall@soton.ac.uk](mailto:n.j.hall@soton.ac.uk)  
023 8120 6146

1  
2  
3  
4  
5  
6  
7  
8  
9  
10  
11  
12  
13  
14  
15  
16  
17  
18  
19  
20  
21  
22  
23  
24  
25  
26  
27  
28  
29  
30  
31  
32  
33  
34  
35  
36  
37  
38  
39  
40  
41  
42  
43  
44  
45  
46  
47  
48  
49  
50  
51  
52  
53  
54  
55  
56  
57  
58  
59  
60

Word count - 2487

Confidential: For Review Only

## Abstract

### **Objectives**

Acute appendicitis is the most common surgical condition in children. In the UK appendicectomy is the most common treatment with non-operative management unusual. Due to concerns about the risk of SARS-CoV-2 transmission during surgical procedures, surgeons were advised to consider non-operative treatment and avoid laparoscopy where possible. This study aims to report management and outcomes, to date, of children with appendicitis in the United Kingdom and Ireland during the COVID-19 pandemic.

### **Design**

Survey of consultant surgeons who treat children with appendicitis that informed a prospective multicentre observational cohort study.

### **Setting**

Data were collected from centres in the United Kingdom and Ireland for cases admitted between April 1st and May 31<sup>st</sup> 2020 (first 2 months of the COVID-19 pandemic) at both general surgical and specialist paediatric surgical centres.

### **Participants**

The study cohort includes 838 children with a clinical and/or radiological diagnosis of acute appendicitis of which 527 (63%) were male.

### **Main outcomes measured**

Primary outcome was treatment strategy used for acute appendicitis. Other outcomes reported include change in treatment strategy over time, use of diagnostic imaging and important patient outcomes to 30 days following hospital admission.

### **Results**

From very early in the pandemic surgeons experienced a change in their management of children with appendicitis and almost all surgeons who responded to the survey anticipated further changes during the pandemic. Overall 326/838 (39%) were initially treated non-operatively of whom 81/326 (25%) proceeded to appendicectomy within the initial hospital admission. Of cases treated initially surgically 243/512 (48%) were performed laparoscopically. Diagnostic imaging was used in 445/838 (53%) children. Cases treated non-operatively had a shorter hospital stay than those treated surgically but



1  
2  
3 hospital readmissions within 30 days were similar between groups. In cases treated surgically the  
4 negative appendicectomy rate was 4.5%. There was a trend towards increased use of surgical  
5 treatment and from open to laparoscopic appendicectomy as the pandemic progressed.  
6  
7

### 8 9 **Conclusion**

10  
11 Non-operative treatment of appendicitis has been widely used for the first time in children in the UK  
12 and Ireland and is safe and effective in selected patients. Overall patient outcomes do not appear to  
13 have been adversely impacted by change in management during the pandemic thus far.  
14  
15  
16  
17  
18  
19

### 20 **What is known about the subject**

- 21
- 22
- 23 • Acute appendicitis is a common condition in children and in the UK is typically treated with  
24 emergency appendicectomy
- 25
- 26 • The SARS-CoV-2 pandemic has caused widespread disruption to healthcare delivery and  
27 surgeons were advised to alter their usual practice due to possible viral transmission during  
28 surgery
- 29
- 30 • How the pandemic would impact on the management and outcomes of children with  
31 appendicitis was unclear  
32  
33  
34  
35

### 36 **What this study adds**

- 37
- 38
- 39 • During the first two months of the pandemic, nearly 40% of all cases of appendicitis were  
40 managed non-operatively
- 41
- 42 • Non-operative treatment appears a safe alternative to surgery for selected cases in this real  
43 world setting and overall treatment outcomes are satisfactory  
44  
45  
46  
47  
48  
49  
50  
51  
52  
53  
54  
55  
56  
57  
58  
59  
60

## Introduction

Acute appendicitis is the most common surgical condition in children and affects approximately 8% of all people throughout their lifetime. In the United Kingdom (UK) treatment of children with appendicitis is shared between general surgeons in district general hospitals and specialist paediatric surgeons at specialist paediatric centres[1] but typically treatment is surgical with the majority of cases undergoing urgent appendicectomy. Although international guidelines do support the use of non-operative treatment for selected children with uncomplicated acute appendicitis [2], non-operative treatment is not widespread in the UK being used by only a small minority of surgeons or as part of a research study.[3]

The SARS-CoV-2 (COVID-19) pandemic has caused widespread disruption to hospitals worldwide. The disruption to the delivery of acute surgical services was anticipated to impact how children with appendicitis were managed for a wide variety of reasons including staff redeployment, operating theatre availability and concerns about transmission of SARS-CoV-2 from patients to healthcare staff during anaesthesia and surgical procedures, particularly during laparoscopic procedures.[4] Early guidance from the Royal College of Surgeons England suggested that laparoscopy should only be used in procedures where the risk of an open procedure to the patient outweighed the potential risk to staff in theatre as laparoscopy was believed to be an aerosol generating procedure (AGP).[4] It was also recommended that non-operative treatment should be used to avoid surgery for all conditions, including appendicitis, if it was considered an acceptable alternative treatment option.[5] In addition it has been shown that exposing a patient with COVID-19 to a surgical procedure has a significant adverse impact on outcome.[6] This may also have influenced surgeons towards greater use of non-operative treatment for children with appendicitis, although data emerged through the first months of the pandemic that children are much less likely to become infected with COVID-19 than adults and the impact of COVID-19 on outcomes following surgery in children is less clear.[7]

The CASCADE study (Children with Appendicitis during the CoronAvirus panDEmic) was initiated in late March 2020 to capture data relating to the impact of this disruption on the management and outcomes of children with appendicitis during the pandemic. The study comprised a rapid survey of surgeons in the UK who treat children to understand the current or anticipated impact of the pandemic on management of children with appendicitis followed by an observational cohort study. This report details the findings of the survey and the management observed during the first 2 months of the pandemic in the UK and early (30 day) outcomes. It is provided to assist surgeons with clinical decision making throughout the pandemic and in the event that there is a second wave resulting in further disruption to acute surgical services.

## Methods

### Survey of surgeons who treat children

A survey was designed to understand the impact of the pandemic on treatment being offered to children with acute appendicitis at the start of the pandemic. Questions were developed, piloted on a convenience sample of surgeons and modified prior to survey distribution. The survey was approved by the research committee of the British Association of Paediatric Surgeons. Specialist paediatric and general surgeons who treat children with appendicitis were invited to complete the survey during the 2-week period leading up to April 14<sup>th</sup> 2020. Invitations were made via personal contacts, social media and mailshots from the British Association of Paediatric Surgeons and the survey was advertised repeatedly through these channels. The survey was administered online using REDCap data capture tool [8] and is available in supplementary material S1. Questions asked were focussed around understanding the impact of the COVID-19 pandemic on the management of children with appendicitis experienced to date, the anticipated impact over the coming weeks and the rationale behind any change in management.

### Cohort study design

This is a prospective multicentre observational cohort study of children aged less than 16 years at time of hospital admission diagnosed with and treated for acute appendicitis in the UK and Ireland. This includes children treated by general surgeons and specialist paediatric surgeons. Participating hospitals were not required to alter diagnostic or treatment pathways and no changes were made to patient care as part of this study. Data collection for the study commenced April 1<sup>st</sup> 2020.

### Centre recruitment and patient identification

Hospitals providing acute surgical care to children were invited to participate in this study via a number of channels including targeted emails, newsletters, social media and websites of surgical and paediatric national organisations including the British Association of Paediatric Surgeons, the Royal College of Surgeons of England, and the Royal College of Paediatrics and Child Health. Children were included in the study if they were diagnosed with and treated for acute appendicitis in hospital. Diagnosis was based on clinical and/or radiological criteria. Children who presented with abdominal pain but not felt to have appendicitis were excluded. This report includes all children in the study dataset with an initial admission date between April 1<sup>st</sup> 2020 and May 31<sup>st</sup> 2020 and for whom 30-day

1  
2  
3 outcome data was provided to the coordinating team by the data cut-off date of 13<sup>th</sup> July 2020. Follow-  
4 up data was censored at 30 days post hospital discharge from initial admission.  
5  
6

## 7 8 Ethical considerations 9

10 This study was registered at each site as a service evaluation, as defined by the health research  
11 authority guidance, as this was an observational study only collecting anonymised routine data with  
12 no change to clinical care pathways.  
13  
14

## 15 16 Outcomes 17

18 The primary outcome was the initial treatment strategy for acute appendicitis, defined as surgical or  
19 non-operative. Secondary outcomes related to patient management included number and proportion  
20 of operative cases performed open and laparoscopically, use of diagnostic imaging and variation in  
21 patient management over time, as the pandemic progressed. Other clinical outcomes were failure  
22 rate of non-operative treatment (defined as appendicectomy within initial hospital inpatient episode  
23 in a case in whom the initial treatment strategy was non-operative), need for hospital readmission,  
24 wound infection, bowel obstruction, intra-abdominal collection, further surgery or interventional  
25 radiology procedure, length of hospital stay and mortality. These outcomes were all reported to 30  
26 days following initial hospital admission and were selected as important outcomes from a core  
27 outcome set for paediatric appendicitis.[9]  
28  
29  
30  
31  
32  
33  
34  
35

## 36 37 Data collection and analysis 38

39 Anonymous data were collected by local study teams within each hospital and submitted to the study  
40 team monthly. Data were checked for duplication since we were aware that some cases were  
41 transferred from one hospital to another during the study period (typically from a district general  
42 hospital to a local specialist paediatric surgery centre) and we wished to avoid duplication. Duplicated  
43 data records were identified and excluded if all of age, sex, CRP and WCC at admission were identical.  
44  
45  
46  
47

48 Statistical analysis was performed using StataSE v15 (StataCorp LLC, Texas, USA) and the figures were  
49 produced using GraphPad Prism v8 (GraphPad Software, La Jolla California USA). Data are presented  
50 as median (IQR or range) and/or number/total (%) as appropriate. Fisher's exact test or chi-squared  
51 test, as appropriate, were used for comparison of categorical data and the Mann Whitney-U test was  
52 used for continuous data. A *p* value of less than 0.05 was considered as statistically significant. The  
53 study was conducted according to Strengthening the Reporting of Observational studies in  
54 Epidemiology (STROBE) guidelines for observational studies.[10]  
55  
56  
57  
58  
59  
60

## Patient and public involvement

Given the restrictions and need for rapid study commencement there was no active patient and public involvement in this study at this stage. There is no relevant patient group of to disseminate findings of this study to.

## Funding

This research received no specific grant from any funding agency in the public, commercial or not-for-profit sectors. The corresponding author had full access to all study data and responsibility for publication.

## Results

### Survey of surgeons who treat children

One hundred and one complete responses (75% specialist paediatric surgeons, 25% general surgeons) were received from surgeons at 19 district general hospitals and 26 specialist children's centres. One fifth of respondents (representing 60% of hospitals) had already experienced some change in their usual clinical management of children with appendicitis. The most frequent changes experienced were the use of non-operative treatment for uncomplicated acute appendicitis (63%), open (instead of laparoscopic) appendicectomy for complicated appendicitis (37%), more frequent use of imaging to confirm diagnosis and greater use of oral rather than intravenous antibiotics (both 32%). In the majority of cases (95%) this change was an active individual surgeon or departmental decision.

Most respondents (87%) indicated they anticipated some change in the management pathway for these children, either in their diagnostic work-up, the type of treatment offered or that they would cease treating children with appendicitis altogether during the coronavirus pandemic (Table 1).

**Table 1: Anticipated future effect on management of children with appendicitis during coronavirus pandemic**

| <b>Anticipated change</b>                                                                                           | <b>GS, n=21<br/>(%)</b> | <b>SPS, n=65<br/>(%)</b> |
|---------------------------------------------------------------------------------------------------------------------|-------------------------|--------------------------|
| <u>Simple appendicitis</u> : I will actively offer non-operative treatment to all children with simple appendicitis | 15 (71)                 | 45 (69)                  |

|                                                                    |                                                                                                                                                                  |         |         |
|--------------------------------------------------------------------|------------------------------------------------------------------------------------------------------------------------------------------------------------------|---------|---------|
| 1<br>2<br>3<br>4<br>5<br>6<br>7<br>8<br>9                          | <u>Simple appendicitis</u> : I will consider non-operative treatment for children with simple appendicitis at parental request                                   | 5 (24)  | 14 (22) |
| 10<br>11<br>12<br>13<br>14<br>15<br>16<br>17<br>18<br>19           | <u>Simple appendicitis</u> : I will actively perform open (as opposed to laparoscopic) appendicectomy in children with simple appendicitis                       | 4 (19)  | 32 (49) |
| 20<br>21<br>22<br>23<br>24<br>25<br>26<br>27<br>28<br>29           | <u>Complicated appendicitis</u> : I will actively offer non-operative treatment to children with complicated appendicitis                                        | 3 (14)  | 10 (15) |
| 30<br>31<br>32<br>33<br>34<br>35<br>36<br>37<br>38                 | <u>Complicated appendicitis</u> : I will consider non-operative treatment to children with complicated appendicitis at parental request                          | 6 (29)  | 11 (17) |
| 39<br>40<br>41<br>42<br>43<br>44<br>45<br>46<br>47                 | <u>Complicated appendicitis</u> : I will actively perform open (as opposed to laparoscopic) appendicectomy in children with complicated appendicitis             | 12 (57) | 44 (68) |
| 48<br>49<br>50<br>51<br>52<br>53<br>54<br>55<br>56<br>57           | <u>Complicated appendicitis</u> : I will actively pursue a shorter than usual course of intravenous antibiotics in children with complicated appendicitis        | 5 (24)  | 9 (14)  |
| 58<br>59<br>60<br>61<br>62<br>63<br>64<br>65<br>66<br>67           | <u>Appendix mass</u> : I will actively offer non-operative treatment to children with appendix mass                                                              | 12 (57) | 26 (40) |
| 68<br>69<br>70<br>71<br>72<br>73<br>74<br>75<br>76<br>77           | <u>Appendix mass</u> : I will consider non-operative treatment to children with appendix mass at parental request                                                | 4 (19)  | 6 (9)   |
| 78<br>79<br>80<br>81<br>82<br>83<br>84<br>85<br>86<br>87           | <u>Appendix mass</u> : I will not offer routine interval appendicectomy in children who have had successful non-operative treatment of appendix mass             | 3 (14)  | 17 (26) |
| 88<br>89<br>90<br>91<br>92<br>93<br>94<br>95<br>96<br>97           | <u>Any appendicitis</u> : Routine imaging for all cases of suspected appendicitis to be certain of diagnosis                                                     | 6 (29)  | 14 (22) |
| 98<br>99<br>100<br>101<br>102<br>103<br>104<br>105<br>106<br>107   | <u>Any appendicitis</u> : CT scan instead of US for diagnosis of appendicitis                                                                                    | 0       | 0       |
| 108<br>109<br>110<br>111<br>112<br>113<br>114<br>115<br>116<br>117 | <u>Any appendicitis</u> : More frequent use of imaging to guide management (e.g. select cases for non-operative treatment / reduce negative appendicectomy rate) | 13 (62) | 31 (48) |
| 118<br>119<br>120<br>121<br>122<br>123<br>124<br>125<br>126<br>127 | <u>Any appendicitis</u> : consultant review for all cases prior to considering surgery                                                                           | 15 (71) | 46 (71) |
| 128<br>129<br>130<br>131<br>132<br>133<br>134<br>135<br>136<br>137 | <u>Any appendicitis</u> : we will likely be sending children with appendicitis to another hospital for treatment                                                 | 3 (14)  | 1 (2)   |
| 138<br>139<br>140<br>141<br>142<br>143<br>144<br>145<br>146<br>147 | <u>Any appendicitis</u> : we will likely be treating children at my hospital who would usually be treated somewhere else                                         | 0       | 33 (51) |

GS – general surgeons, SPS – specialist paediatric surgeons

## Observational cohort study - children included and radiological investigations

Data were submitted prior to the data cut-off date for this report for 838 children treated for appendicitis between April 1<sup>st</sup> and May 31<sup>st</sup> 2020 in 67 centres (approximately half of all centres who

1  
2  
3 treat children with appendicitis in the UK). No duplicated records were identified so all are included.  
4  
5 The median age was 10 (range 1-15) years and 527 (63%) children were male. General surgeons  
6  
7 treated 343 (41%) of cases with the remaining 496 (59%) being treated by specialist paediatric  
8  
9 surgeons. In this cohort of children treated for appendicitis, diagnostic imaging was used in 445 (53%)  
10  
11 children with abdominal ultrasound and abdominal computed tomography (CT) scan undertaken in  
12  
13 420 (50%) and 46 (5.5%) cases respectively. At the point of diagnosis 600 children (72%) were  
14  
15 suspected by the treating surgeon to have simple acute appendicitis, 201 (24%) complicated  
16  
17 appendicitis and 35 (4%) an appendix mass (data missing in 3 cases).

17  
18 At diagnosis of acute appendicitis the COVID-19 status was known positive in 4 (0.5%) children, known  
19  
20 negative in 171 (20%) children, tested awaiting result in 397 (47%) children and 266 (32%) children  
21  
22 were untested.

### 23 Initial treatment strategy

24  
25 Initial treatment strategy was non-operative in 326 (39%) children. In the 512 (61%) children treated  
26  
27 initially with surgery, 262 (52%) had an open procedure and 243 (48%) an initially laparoscopic  
28  
29 procedure (data on surgical approach not available for 7 cases). Initial treatment stratified by  
30  
31 suspected severity of appendicitis at diagnosis is shown in Figure 1.

32  
33 Comparative clinical, laboratory and radiological details for cases treated surgically and non-  
34  
35 operatively are shown in Table 2. Cases treated surgically typically had more advanced appendicitis  
36  
37 with higher CRP and white cell count at diagnosis and were more likely to have suspected complicated  
38  
39 (as opposed to simple) appendicitis. A higher proportion of cases treated non-operatively had an  
40  
41 ultrasound scan than of cases treated surgically. Of cases suspected to be simple appendicitis 43%  
42  
43 (259/600) were initially treated non-operatively compared to 20% (40/201) of cases suspected to be  
44  
45 complicated appendicitis.

46  
47 For cases treated surgically with either open or laparoscopic appendicectomy, comparative clinical,  
48  
49 laboratory and radiological details for are shown in Table 3. Overall 48% (n=243) of cases that were  
50  
51 treated surgically underwent a laparoscopic procedure. There was no relationship identified between  
52  
53 choice of procedure and suspected severity of appendicitis pre-operatively. Cases treated  
54  
55 laparoscopically were older, more likely to be treated by a specialist paediatric surgeon and more likely  
56  
57 to have had a diagnostic ultrasound than cases performed open. For both open and laparoscopic  
58  
59 procedures surgeons tended to underestimate disease severity at diagnosis compared to the surgical  
60  
findings (Table 3). The overall negative appendicectomy rate was 4.5% (n=23) in cases treated  
surgically.



## Change in initial treatment method during the pandemic

During the first week of April 2020 the proportion of cases initially treated non-operatively was 49% which reduced to 33% in the last week of May 2020, (Figure 1). Of those cases treated operatively, 79% were by open appendicectomy during the first week of April 2020 and this reduced to 41% in the last week of May 2020 (Figure 2).

### Figures

**Figure 1** Initial treatment stratified by suspected severity of appendicitis at diagnosis

\* Data on severity at diagnosis missing for 2 cases; both had non-operative treatment; § Data on surgical approach missing for 7 cases; NOT – non-operative treatment; Lap - laparoscopic

**Figure 2.** Initial management strategy of appendicitis by week, operative vs non-operative.

The red bars represent operative treatment and the blue bars represent non-operative treatment demonstrating a trend towards operative treatment over time.

**Figure 3.** Initial operative management strategy of appendicitis by week, open vs laparoscopic.

The red bars represent laparoscopic appendicectomy and the blue bars represent open appendicectomy demonstrating a trend towards laparoscopic appendicectomy over time.

**Table 2** Clinical, laboratory and radiological characteristics of cases treated initially non-operatively or operatively

|                              | Non-operative<br>(n= 326) | Operative<br>(n=512) | <i>p</i> |
|------------------------------|---------------------------|----------------------|----------|
| Age (years)                  | 10.5 (8-13)               | 10 (8-12)            | 0.19     |
| Male (n, %)                  | 195 (60)                  | 331 (65)             | 0.16     |
| Duration of symptoms (hours) | 36 (24-72)                | 48 (24-72)           | 0.58     |



|                                         |                           |                  |                  |         |
|-----------------------------------------|---------------------------|------------------|------------------|---------|
| Speciality (n, %)                       | GS                        | 140 (43)         | 202 (39)         | 0.35    |
|                                         | SPS                       | 186 (57)         | 310 (61)         |         |
| Admission bloods                        | WCC – x10 <sup>9</sup> /L | 14.4 (10.7-17.8) | 15.2 (12.0-18.5) | 0.01    |
|                                         | CRP - mg/L                | 32 (7.1-81)      | 52 (15-126)      | <0.0001 |
| US performed (n, %)                     |                           | 193 (59)         | 227 (44)         | <0.0001 |
| CT performed (n, %)                     |                           | 16 (4.9)         | 30 (5.9)         | 0.76    |
| Suspected severity at diagnosis (n, %)* | Simple                    | 259 (80)         | 341 (67)         | <0.0001 |
|                                         | Complicated               | 40 (12)          | 161 (31)         |         |
|                                         | Appendix mass             | 25 (7.7)         | 10 (2.0)         |         |
|                                         |                           |                  |                  |         |

\*For 2 cases suspected severity was missing; GS – general surgeon; SPS – specialist paediatric surgeon; WCC – white cell count; CRP – C-reactive protein; L – litre; mg – milligrams.

### Patient outcomes to 30-days

For 326 cases treated non-operatively, 81 (25%) children failed non-operative treatment during the initial admission. This failure rate in cases suspected to be simple appendicitis was 24% (62/259) and for those suspected to be complicated appendicitis was 30% (12/40). All these cases proceeded to appendicectomy which was approached via an open procedure in 35 (44%) cases and a laparoscopic procedure in 45 (56%) cases (data missing in 1 case). Where available (missing n=2), intra-operative findings in those who failed initial non-operative treatment were normal appendix in 4 (4.9%) children, simple appendicitis in 37 (47%) children, complicated appendicitis in 32 (41%) children and appendix mass in 6 (7.4%) children.

Overall, cases treated operatively had a longer length of initial inpatient stay compared to those treated initially non-operatively (3 [2-5] vs 2 [1-4] days,  $p<0.0001$ ). Overall, the 30-day readmission rate was 12% (30/245) for non-operative treatment in those that were discharged home without an operation and 7.4% (38/512) in those treated initially with an operation. Reasons for readmission in cases treated operatively were abdominal collection/abscess (n=17), abdominal pain (n=11), fever (n=2), wound dehiscence/infection (n=6) and small bowel obstruction (n=1). Reasons for readmission in the group which underwent non-operative treatment without appendicectomy prior to discharge were abdominal collection/abscess (n=4), abdominal pain (n=20) and fever (n=4). Note that in some cases there were multiple reasons for readmission or the reason was not specified.

At 30-days there were no reported deaths. Children undergoing an open procedure had a similar rate of readmission (7 [n=19] vs 8% [n=19],  $p=0.87$ ), wound infection (4 [n=10] vs 2% [n=4],  $p=0.18$ ), bowel

obstruction (1 [n=2] vs 1% [n=3], p=0.68), intra-abdominal collection (8 [n=21] vs 10% [n=25], p=0.44) and re-operation (3 [n=8] vs 5% [n=13], p=0.27) to those who had a laparoscopic procedure. An open procedure was associated with a shorter length of inpatient stay compared to a laparoscopic procedure (2 [2-4] vs 3 [2-6], p=0.005). These outcomes are further stratified by severity of appendicitis in Table 4.

**Table 3 Clinical, laboratory and radiological characteristics of cases treated initially operatively stratified by open or laparoscopic procedure**

|                                          |                           | Open<br>(n=262)  | Laparoscopic<br>(n=243) | p      |
|------------------------------------------|---------------------------|------------------|-------------------------|--------|
| Age (years)                              |                           | 10 (7-12)        | 11 (9-13)               | 0.0004 |
| Male (n,%)                               |                           | 176 (67)         | 149 (61)                | 0.19   |
| Speciality (n,%)                         | GS                        | 119 (60)         | 81 (40)                 | 0.006  |
|                                          | SPS                       | 143 (47)         | 162 (53)                |        |
| Admission bloods                         | WCC – x10 <sup>9</sup> /L | 15.6 (12.3-18.6) | 14.9 (11.6-18.0)        | 0.34   |
|                                          | CRP - mg/L                | 52 (15-130)      | 52 (15-124)             | 0.91   |
| US performed (n,%)                       |                           | 101 (39)         | 122 (50)                | 0.009  |
| CT performed (n,%)                       |                           | 18 (6.8)         | 12 (4.9)                | 0.19   |
| Suspected severity pre-operatively (n,%) | Simple                    | 182 (69)         | 155 (64)                | 0.40   |
|                                          | Complicated               | 76 (29)          | 84 (35)                 |        |
|                                          | Appendix mass             | 4 (1.5)          | 4 (1.7)                 |        |
| Operative findings (n,%)                 | Normal                    | 13 (5.0)         | 10 (4.1)                | 0.66   |
|                                          | Mass                      | 7 (2.7)          | 8 (3.3)                 |        |
|                                          | Simple                    | 128 (49)         | 108 (44)                |        |
|                                          | Complicated               | 113 (43)         | 117 (48)                |        |

Data missing for 7 cases. GS – general surgeon; SPS – specialist paediatric surgeon; WCC – white cell count; CRP – C-reactive protein; L – litre; mg – milligrams.

Table 4 Comparative outcomes for cases treated initially operatively stratified by operative findings

| Table 4                                   | Simple or No appendicitis |                      |      | Complicated appendicitis or Appendix Mass |                      |       |
|-------------------------------------------|---------------------------|----------------------|------|-------------------------------------------|----------------------|-------|
|                                           | Open (n=141)              | Laparoscopic (n=118) | p    | Open (n=120)                              | Laparoscopic (n=125) | p     |
| Readmission (n, %)                        | 4 (2.8)                   | 4 (3.4)              | 1.00 | 15 (13)                                   | 15 (12)              | 1.00  |
| Wound infection (n, %)                    | 0 (0)                     | 2 (1.7)              | 0.21 | 10 (8.3)                                  | 2 (1.6)              | 0.02  |
| Bowel obstruction (n, %)                  | 0 (0)                     | 0 (0)                | 1.00 | 2 (1.7)                                   | 3 (2.4)              | 1.00  |
| Intra-abdominal collection/abscess (n, %) | 4 (2.8)                   | 2 (1.7)              | 0.69 | 17 (14)                                   | 23 (18)              | 0.39  |
| Reoperation /IR procedure (n, %)          | 1 (0.7)                   | 0 (0)                | 1.00 | 7 (5.8)                                   | 13 (10)              | 0.25  |
| Length of stay (days, median and IQR)     | 2 (1-3)                   | 2 (1-3)              | 0.33 | 4 (2-6)                                   | 6 (4-8)              | 0.001 |

IR – interventional radiology

## Discussion

This report confirms anecdotal suspicion that the management of children with appendicitis has been significantly changed during the coronavirus pandemic with a clear shift towards non-operative management and towards open appendicectomy in cases managed surgically. Although we do not present here any comparative data to a different time period, the use of non-operative treatment for children with acute appendicitis was extremely limited in a survey performed in 2018[3] and anecdotally we do not believe there has been a significant change in practice prior to the start of the pandemic. The fact that overall just under 40% of children with suspected appendicitis were treated initially non-operatively represents a huge change in practice. This change was seen from early in the pandemic as reported in our initial survey and was anticipated by the majority of survey respondents. A small number of recent reports suggest that such changes in the management of appendicitis are not unique to the UK but have been implemented in a number of countries.[11-13]

Interestingly over the course of this data collection period the proportion of cases undergoing non-operative management decreased and the proportion of cases treated surgically having a laparoscopic procedure increased over time. We suspect this pattern is a reflection of initial guidance from

1  
2  
3 professional bodies proposing non-surgical treatments be sought wherever possible and cautioning  
4 against the use of laparoscopy.[5] Subsequent evolution of that guidance over time may have  
5 encouraged surgeons to resume their normal practice. We intend to monitor surgical practice longer  
6 term during the pandemic to identify any further changes in management.  
7  
8  
9

10 The sudden widespread uptake of non-operative treatment of appendicitis seen to date during the  
11 pandemic presents an opportunity to evaluate non-operative treatment in a real world setting across  
12 multiple centres in a way that until recently would not have been imagined possible. These early data  
13 suggest that non-operative treatment of acute appendicitis is effective and safe in a real-world setting.  
14 Further work is needed however, to determine whether the outcomes from non-operative  
15 management are acceptable to children with appendicitis, their parents and other stakeholders  
16 including surgeons. Cases treated non-operatively achieved a shorter length of stay than cases treated  
17 surgically, there were no deaths and the adverse event profile of each treatment approach was similar.  
18 These data suggest that surgeons selected less severe cases for non-operative treatment despite no  
19 formal guidelines existing for this purpose. Yet it remains likely that non-operative treatment has been  
20 used here outside the criteria used to date in formal research studies in which it has been  
21 evaluated.[14-16] Of note 12% of cases in which non-operative treatment was used as first line  
22 therapy were suspected to be complicated appendicitis.  
23  
24  
25  
26  
27  
28  
29  
30  
31  
32

33 Both open and laparoscopic appendicectomy are recognised to be safe and effective treatments for  
34 children with appendicitis although there has been increased uptake of laparoscopic appendicectomy  
35 in children in the UK in recent years.[17] The reversal of this trend during the pandemic such that just  
36 48% of all cases treated surgically were performed laparoscopically is likely in response to guidance  
37 from professional bodies that laparoscopy may increase the risk of SARS-CoV-2 transmission in  
38 positive cases.[4] Anecdotally we are aware that a move away from laparoscopy has been  
39 implemented by some individual surgeons and also by some institutions. The trend towards a higher  
40 proportion of cases being performed laparoscopically over time (Figure 2) is consistent with updated  
41 guidance from professional bodies and a greater understanding about the epidemiology of COVID-19  
42 in children[7].  
43  
44  
45  
46  
47  
48  
49

50 Recently the high negative appendicectomy rate observed in the UK (15.9% in children) has been  
51 highlighted and achieved significant public interest.[18, 19] It is therefore of particular note that the  
52 negative appendicectomy rate seen in this dataset is extremely low, and in fact one of the lowest rates  
53 reported in the UK to date[1, 18, 20]. The caveat to this, however, is that we have reported  
54 intraoperative findings rather than histological findings and the rate based on histology may in fact be  
55 higher. Alongside this, radiological imaging (both US and CT) has been seen more frequently during  
56  
57  
58  
59  
60

1  
2  
3 the period of the pandemic than in a published national dataset (53% vs 41%) [18]. It is not clear  
4 whether increasing use of imaging has resulted in such a low negative appendicectomy rate but it is  
5 certainly a possibility. Other factors may also be contributory however, including increased use of non-  
6 operative treatment and potentially increased consultant involvement in decision making. Given cases  
7 have been selected for non-operative treatment by clinicians, it is possible that some children who  
8 would have otherwise undergone negative appendicectomy were selected for non-operative  
9 treatment instead. Although we do not have data on consultant involvement in decision making on a  
10 case by case basis within this dataset, just over 70% of consultants anticipated there would be greater  
11 consultant involvement in management of children with appendicitis in the survey undertaken at the  
12 beginning of the pandemic. This is certainly an area worthy of further investigation since a reduction  
13 in the negative appendicectomy rate may be seen as an unanticipated benefit that it would be  
14 beneficial to maintain in the longer term. The COVID-19 pandemic may inadvertently be presenting  
15 opportunities for quality improvement that should be realised beyond the period of the pandemic  
16 itself.

17  
18  
19  
20  
21  
22  
23  
24  
25  
26  
27 The strengths of this study are that data have been collected prospectively from multiple centres,  
28 including representation from all nations, across the United Kingdom and Ireland. We deliberately did  
29 not involve other international centres so as to achieve a region across which there is relative  
30 consistency in management of children with appendicitis. This early analysis has been performed  
31 following a change in surgical practice to inform ongoing management during the pandemic and in the  
32 event of a second wave. The findings are likely generalisable to other countries in whom management  
33 is similar to that in the United Kingdom and Ireland. As a pragmatic real world study it provides an  
34 overview of real life outcomes outside the confines that would typically be achieved in a clinical trial.  
35 Conversely some may view this pragmatism as a limitation since we have not used precise definitions  
36 for severity of appendicitis nor have we proposed criteria for different treatment strategies. This may  
37 explain a comparable failure rate of non-operative treatment in those with suspected simple and  
38 complicated appendicitis. An additional limitation of any study looking at non operative treatment of  
39 appendicitis is that we cannot be sure whether those who underwent non operative treatment  
40 definitely had appendicitis. Whilst any such resulting 'over-treatment' may be viewed by some as  
41 regrettable, the risk/benefit profile of these two treatments is likely to be in favour of non-operative  
42 treatment over unnecessary operation for the majority of cases. However, improved positive  
43 identification of cases with appendicitis should remain the goal so that only children who truly have  
44 appendicitis receive treatment for it. A further limitation on terms of assessing the outcomes following  
45 non-operative treatment is that we have only reported outcomes to 30 days. We plan further analysis  
46 of a larger patient cohort to include longer term follow-up particularly of the group of children  
47  
48  
49  
50  
51  
52  
53  
54  
55  
56  
57  
58  
59  
60

1  
2  
3 managed thus far without surgery. Finally, it is conceivable that the initial survey raised awareness of  
4 the use of alternative management strategies and may in itself have influenced practice, although 95%  
5 of respondents stated that an active decision was being made suggesting this is unlikely for the  
6 majority.  
7  
8  
9

10 In conclusion we present evidence that the COVID-19 pandemic has had a marked impact on the  
11 management of children with appendicitis with clear shifts towards increased use of non-operative  
12 treatment and open (as opposed to laparoscopic) appendicectomy. Despite the absence of formal  
13 guidelines, non-operative treatment appears safe and effective in children who have been selected  
14 for this treatment modality. Overall these data should reassure surgeons about management strategy  
15 used during the pandemic in the face of restrictions to normal surgical services and may inform best  
16 practice in future times of limited surgical capacity.  
17  
18  
19  
20  
21  
22  
23  
24  
25

### 26 CASCADE study steering and writing group:

27  
28  
29 George S Bethell (Southampton Children's Hospital and University of Southampton, Southampton,  
30 UK), Clare M Rees (Imperial College Healthcare NHS Trust, London, UK), Jonathan Sutcliffe (Leeds  
31 Teaching Hospitals NHS Trust, Leeds, UK), Nigel J Hall (Southampton Children's Hospital and University  
32 of Southampton, Southampton, UK)  
33  
34  
35  
36  
37  
38

### 39 Collaborators

40  
41 Anna-May Long, Florin Djendov, Victor Emordi, Cambridge University Hospitals; Mark Peter, Sarah  
42 Staight, Andrew Jackson, Huddersfield Royal Infirmary; Stewart Cleeve, Arun Kelay, Royal London  
43 Hospital; Michael Terry, Christina Major, Oscar Croysdale, Mike Nelson, St Mary's Hospital; Eleri  
44 Cusick, Hannah Rhodes, Juliette King, Sophie Lewis, Bristol Children's Hospital; Chris Driver, Gillian  
45 Winter, Royal Aberdeen Children's Hospital; Michael Wilson, Forth Valley Royal Hospital; Selena  
46 Curkovic, Raef Jackson, Bhushanrao Jadhav, University Hospital of Wales; Thomas Raymond, Vijay  
47 Gangalam, Deepak Selvakumar, Thomas Raymond, Royal Lancaster Infirmary; Khalid Elmalik, Reda  
48 Habak, Muslim Abdullah, Mohamed Ahmed Osama, Leicester Royal Infirmary; Milan Gopal, Laura  
49 Phillips, Khlud Asanai, Hany Gabra, Great North Children's hospital; Noman Zafar, Sophia Lewis,  
50 Florence Kashora, Dixa Thakrar, Northwick Park Hospital; Dean Rex, Annita Budzanowski, St George's  
51 Hospital; Jennifer Binnington, Simon Timbrell, Megan Ridgeway, East Lancashire Hospital NHS trust;  
52 Shirley Chan, Amani Asour, Adetayo Aderombi, Medway Maritime Hospital; Donald Menzies, Ali  
53  
54  
55  
56  
57  
58  
59  
60

1  
2  
3 Murtada, Corina Dragu, Vincent Quan, Colchester Hospital; Alan Askari, Krashna Patel, Luton and  
4 Dunstable University Hospital; Merrill McHoney, Hetal Patel, Sesi Hotonu, Ashley Meikle, Royal  
5 Hospital for Children, Edinburgh; Andrew Beamish, Royal Gwent Hospital, Newport; Ajay Belgaumkar,  
6 Bankole Oyewole, Prabhat Narayan, Surrey and Sussex Healthcare NHS Trust; Marianne Hollyman,  
7 Angeliki Kosti, Thomas Badenoch, Musgrove Park Hospital; Frances Goulder, Katie Siggins, Kizzie  
8 Peters, Fiona Kirkham, Royal Hampshire County Hospital, Winchester; Paul Froggatt, Karen Lai, Cristina  
9 Navarro, Dorinda Chandrabose, Poole Hospital; Simon Toh, Portsmouth Hospital NHS Trust; Ingo  
10 Jester, Ben Martin, Birmingham Women's and Children's Hospital; Elizabeth Gemmill, King's Mill  
11 Hospital; Richard Egan, Keira Lily, Morrision, Swansea; Mark Dilworth, Dimitrios Stamatiou,  
12 Birmingham Heartlands Hospital; Alasdair Macmillan, Joshua McIntyre, Danielle Clyde, Majid Rashid,  
13 Victoria Hospital Kirkcaldy; Gandrapu Srinivas, Torbay Hospital, Torquay Hospital; Katherine Buckley,  
14 Darren Smith, Wirral University Teaching Hospital NHS Trust; Henry Dowson, Gautam Singh, Frimley  
15 Park Hospital; Seshu Kumar Bylapudi, Milton Keynes University Hospital; Louise Phillips, Kimberley  
16 Hallam, Marisa Clemente, Tanzeela Gala, Glan Clwyd Hospital; Karol Pal, Borders General Hospital,  
17 Melrose; George Ninkovic-Hall, Emila Paul, Leighton Hospital; Theo Pelly, Joe Vance-Daniel, Kingston  
18 Hospital; Venkatesh Kanakala, Edward J Nevins, James Dixon, Michael John, James Cook University  
19 hospital; Jude Prince, Dale Vimalachandran, Countess of Chester NHS Foundation Trust; Georgios  
20 Karagiannidis, Ipswich Hospital NHS Trust; Suzette Samlalsingh, Chrstine Ozone, Amina Bouhelal,  
21 Queen's Hospital, Barking, Havering and Redbridge University Hospitals NHS Trust; Siddhartha Handa,  
22 Furness General Hospital; Andrew Mitchell, Sathasivam Rajeev, Ellen Ross, Ali Wadah, Darlington  
23 Memorial Hospital; Tim Bradnock, John Hallett, Aileen Rooney, Royal Hospital for Children, Glasgow;  
24 Shirish Tewari, Vinay Shah, Vivek Gupta, Nick Reay-Jones, Lister Hospital; Salman Bodla, Nuha Yassin,  
25 New Cross Hospital Wolverhampton; Harriet Corbett, Sumita Chhabra, Alder Hey Children's Hospital;  
26 Athanasios Tyraskis, Benjamin Allin, Angus Fitchie, Oxford University Hospital Trust; Michael Stanton,  
27 Dina Fouad, Southampton Children's Hospital; Mark Vipond, Harry Dean, Matthew Boal, Oliver Brown,  
28 Gloucestershire Royal Hospital; Jonathan Goring, Mahmoud Marei, Christian Verhoef, Jonathan  
29 Ducey, Royal Manchester Childrens Hospital; Clare Rees, Chipu Mushonga, Dan Frith, Imperial College  
30 Healthcare NHS Trust; Ashok Ram, Tristan Boam, Melissa Gabriel, Ferzine Mohamed, Norfolk and  
31 Norwich University Hospital; David Williams, Katie Cross, Nadine Dyar, Rick MacMahon, Mohammed  
32 Fakhurul-Aldeen, Iain Bain, David Bunting, North Devon District Hospital; Graham Branagan, Rachel  
33 Carten, Chee Wan Lai, Lydia Longstaff, Salisbury Hospital; Anindya Niyogi, Claudia Koh, Michael John,  
34 Christian Fox, Nottingham Children's Hospital; Stavros Loukogeorgakis, Joe Curry, Kate Cross, Jayaram  
35 Sivaraj, Great Ormond Street Hospital; Sean Marven, Milda Jancauskaite, Helen Please, Wayne  
36 Fradley, Sheffield Childrens Hospital; Fenella Welsh, Maki Jitsumara, Basingstoke Hospital; Sinead  
37  
38  
39  
40  
41  
42  
43  
44  
45  
46  
47  
48  
49  
50  
51  
52  
53  
54  
55  
56  
57  
58  
59  
60



1  
2  
3 Hassett, Ancuta Muntean, Ionica Stoica, Sarah Yassin, Children's Health Ireland, Crumlin; Suzanne  
4 Lawther, David Colvin, Ciaran Durand, Royal Belfast Hospital for Sick Children; Mohamed Eltom, Hull  
5 University Teaching Hospital; Iain Yardley, Kirsty Brennan, Clara Chong, Evelina Hospital; Hasan  
6 Mukhtar, Hany Khalil, Stephanie Clark, Whittington Health NHS trust; Ashish Desai, Ben Woodward,  
7 Kings College Hospital; Amulya Saxena, Joshua Cave, Chelsea and Westminster Hospital; Alistair  
8 Sharples, University Hospitals of North Midlands.  
9  
10  
11  
12

## 13 14 15 16 17 18 19 20 21 22 23 24 25 26 27 28 29 30 31 32 33 34 35 36 37 38 39 40 41 42 43 44 45 46 47 48 49 50 51 52 53 54 55 56 57 58 59 60

1. Giuliani S, Cecil EV, Apelt N, Sharland M, Saxena S. Pediatric Emergency Appendectomy and 30-Day Postoperative Outcomes in District General Hospitals and Specialist Pediatric Surgical Centers in England, April 2001 to March 2012: Retrospective Cohort Study. *Ann Surg.* 2016;263(1):184-90.
2. Di Saverio S, Podda M, De Simone B, Ceresoli M, Augustin G, Gori A, et al. Diagnosis and treatment of acute appendicitis: 2020 update of the WSES Jerusalem guidelines. *World Journal of Emergency Surgery.* 2020;15(1):27.
3. Hall NJ. CONservative TRreatment of Appendicitis in Children a randomised controlled Trial CONTRACT (Feasibility study). *health technol Assess* 2020;in press.
4. De Simone B, Chouillard E, Di Saverio S, Pagani L, Sartelli M, Biffi WL, et al. Emergency surgery during the COVID-19 pandemic: what you need to know for practice. *Ann R Coll Surg Engl.* 2020;102(5):323-32.
5. S H, D D. Joint guidance for surgeons: guidance for surgeons working during the COVID-19 pandemic from the Surgical Royal Colleges of the United Kingdom and Ireland. Royal College of Surgeons of England. <https://www.rcseng.ac.uk/coronavirus/joint-guidance-for-surgeons-v1/2020>.
6. Collaborative C. Mortality and pulmonary complications in patients undergoing surgery with perioperative SARS-CoV-2 infection: an international cohort study. *Lancet.* 2020;396(10243):27-38.
7. Munro AR, D. THE MISSING LINK? CHILDREN AND TRANSMISSION OF SARS-COV-2 2020 [Available from: <https://dontforgetthebubbles.com/the-missing-link-children-and-transmission-of-sars-cov-2/>].
8. Harris PA, Taylor R, Thielke R, Payne J, Gonzalez N, Conde JG. Research electronic data capture (REDCap)--a metadata-driven methodology and workflow process for providing translational research informatics support. *J Biomed Inform.* 2009;42(2):377-81.
9. Sherratt FC, Allin BSR, Kirkham JJ, Walker E, Young B, Wood W, et al. Core outcome set for uncomplicated acute appendicitis in children and young people. *Br J Surg.* 2020.
10. von EE, Altman DG, Egger M, Pocock SJ, Gotsche PC, Vandenbroucke JP. The Strengthening the Reporting of Observational Studies in Epidemiology (STROBE) statement: guidelines for reporting observational studies. *J Clin Epidemiol.* 2008;61(4):344-9.
11. Saleem A, Sajid MI, Arshad M. Acute appendicitis during SARS-CoV-2: A brief communication of patients and changes in clinical practice from a single institute in Pakistan. *J Pediatr Surg.* 2020.
12. Ogundele IO, Alakaloko FM, Nwokoro CC, Ameh EA. Early impact of COVID-19 pandemic on paediatric surgical practice in Nigeria: a national survey of paediatric surgeons. *BMJ Paediatrics Open.* 2020;4(1):e000732.
13. Nasher O, Sutcliffe JR, Stewart RJ. Pediatric Surgery during the COVID-19 Pandemic: An International Survey of Current Practice. *Eur J Pediatr Surg.* 2020.
14. Minneci PC, Mahida JB, Lodwick DL, Sulkowski JP, Nacion KM, Cooper JN, et al. Effectiveness of Patient Choice in Nonoperative vs Surgical Management of Pediatric Uncomplicated Acute Appendicitis. *JAMA Surg.* 2015:1-8.
15. Armstrong J, Merritt N, Jones S, Scott L, Butter A. Non-operative management of early, acute appendicitis in children: is it safe and effective? *J Pediatr Surg.* 2014;49(5):782-5.



- 1  
2  
3 16. Gorter RR, van der Lee JH, Cense HA, Kneepkens CM, Wijnen MH, In 't Hof KH, et al. Initial  
4 antibiotic treatment for acute simple appendicitis in children is safe: Short-term results from a  
5 multicenter, prospective cohort study. *Surgery*. 2015;157(5):916-23.  
6  
7 17. Bethell G, Adams S, Johnson T, Hall N, Stanton M. Laparoscopy uptake for paediatric  
8  
9 appendicectomy – a comparison of adult general surgeons vs paediatric surgeons  
10 in England from 1997 to 2015. *66<sup style="">th British Association of Paediatric Surgeons Annual*  
11  
12 *International Congress*; Nottingham, UK. 2019.  
13 18. Collaborative RSGobotWMR. Appendicitis risk prediction models in children presenting with  
14 right iliac fossa pain (RIFT study): a prospective, multicentre validation study. *Lancet Child Adolesc*  
15 *Health*. 2020;4(4):271-80.  
16 19. Donnelly L. Women needlessly having their appendix out in almost one in three cases. *The*  
17 *Daily Telegraph*. 2019.  
18 20. Tiboni S, Bhangu A, Hall NJ. Outcome of appendicectomy in children performed in paediatric  
19 surgery units compared with general surgery units. *Br J Surg*. 2014;101(6):707-14.  
20  
21  
22  
23  
24  
25  
26  
27  
28  
29  
30  
31  
32  
33  
34  
35  
36  
37  
38  
39  
40  
41  
42  
43  
44  
45  
46  
47  
48  
49  
50  
51  
52  
53  
54  
55  
56  
57  
58  
59  
60

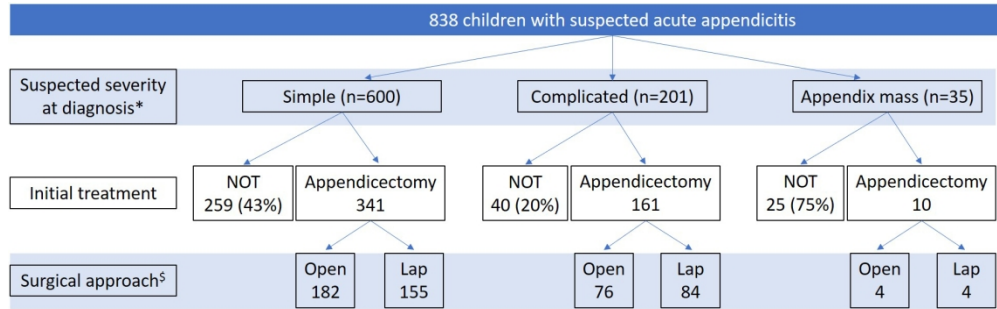

1  
2  
3  
4  
5  
6  
7  
8  
9  
10  
11  
12  
13  
14  
15  
16  
17  
18  
19  
20  
21  
22  
23  
24  
25  
26  
27  
28  
29  
30  
31  
32  
33  
34  
35  
36  
37  
38  
39  
40  
41  
42  
43  
44  
45  
46  
47  
48  
49  
50  
51  
52  
53  
54  
55  
56  
57  
58  
59  
60

### Initial Management of Suspected Appendicitis Operative vs non-operative per week

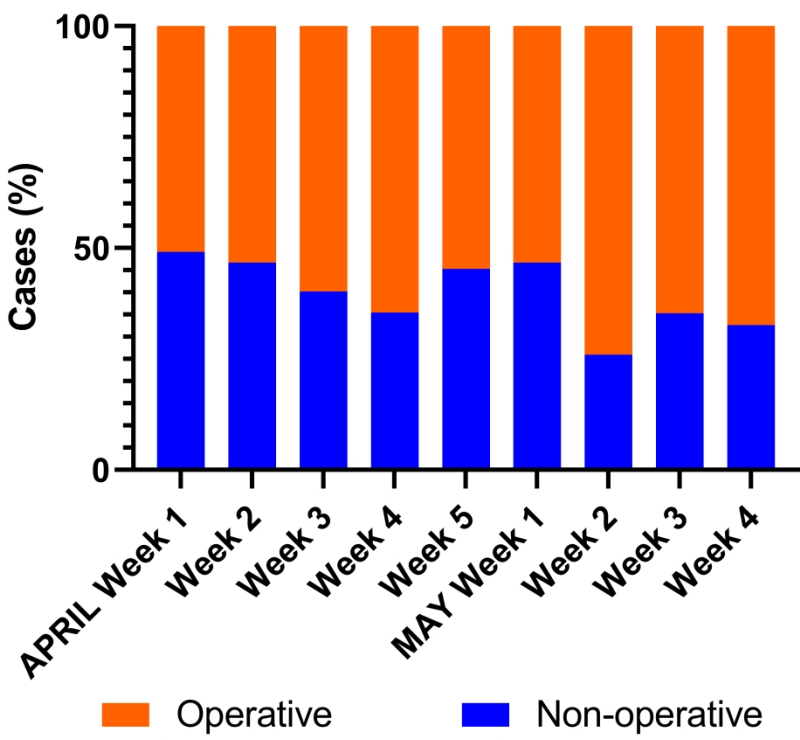

114x105mm (1200 x 1200 DPI)

## Initial Management of Suspected Appendicitis Open vs Laparoscopic per week

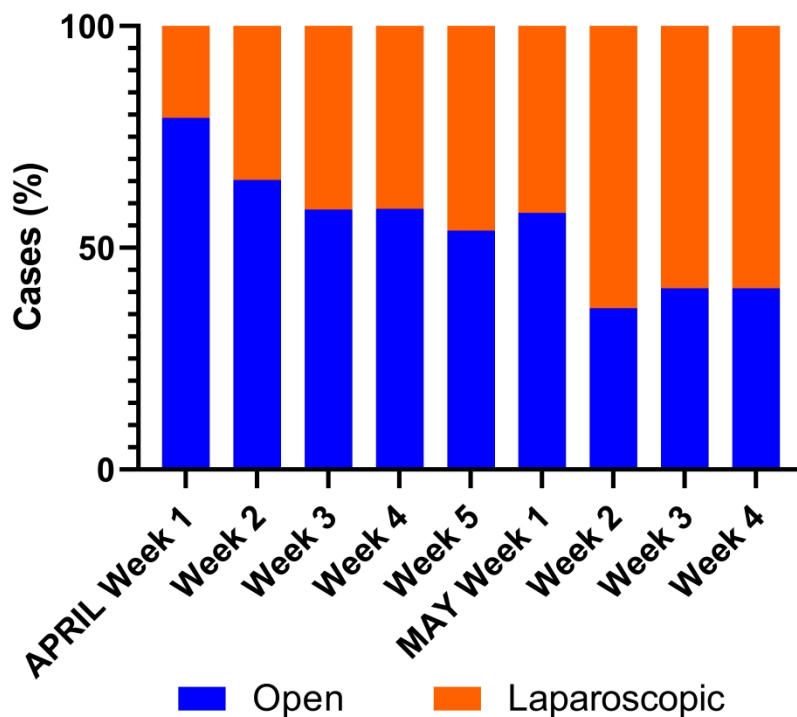

114x103mm (1200 x 1200 DPI)

# Children with Appendicitis during the Coronavirus pandemic (CASCADE)

The current coronavirus pandemic is placing NHS services in an unprecedented situation and there will be impact on the delivery of care for non-coronavirus patients. Guidance from the Royal Colleges recommends change in standard surgical treatment pathways. Clinicians may decide or be encouraged to consider treating some conditions differently to their usual practice. This will certainly have an impact on practice and may influence outcomes.

The management of children with acute appendicitis is one such condition. A number of different treatment options exist and current pathways may well be changed in some centres.

This CASCADE study has been set-up to capture data relating to this.

This initial survey aims to capture the current and anticipated impact of the coronavirus pandemic on treatment of children with acute appendicitis. It comprises just 4 questions and should take no more than 5 minutes to complete.

It is for completion by consultants only please. This is not because we don't value the views of trainees but in this particular instance we feel that consultants are more likely than ever going to be making decisions.

We will generate a rapid summary of the data in order to provide you with an overview of how practice is changing across the country and to share ideas for change that are considered useful.

All responses will be treated anonymously. Please complete the entire survey for your responses to be saved.

## Definitions

For the purposes of the questions that follow please use the following definitions:

**SIMPLE APPENDICITIS:** a child with a presumed clinical or radiological diagnosis of simple appendicitis.

**COMPLICATED APPENDICITIS:** a child with a presumed clinical or radiological diagnosis of complicated appendicitis (comprising anything other than simple appendicitis but not an appendix mass).

**APPENDIX MASS:** a child that has a presumed clinical or radiological diagnosis of an appendix mass.

We appreciate it is not always possible to make an accurate distinction between these groups but please answer the questions the best you can according to these definitions.

**Question 1**

In the past 2 weeks have you managed a child with acute appendicitis differently to your usual practice as a result of the coronavirus pandemic?

- Yes  
 No

In what way was your management of SIMPLE APPENDICITIS different to your usual practice?

- Simple appendicitis: used non-operative treatment as opposed to appendicectomy  
 Simple appendicitis: used enteral antibiotics or shorter course of IV if managing conservatively  
 Simple appendicitis: longer delay than usual in gaining access to operating theatre  
 Simple appendicitis: used open approach in place of laparoscopy  
(Tick all that apply)

In what way was your management of COMPLICATED APPENDICITIS different to your usual practice?

- Complicated appendicitis: used non-operative treatment as opposed to appendicectomy  
 Complicated appendicitis: earlier switch to oral antibiotics  
 Complicated appendicitis: longer delay than usual in gaining access to operating theatre  
 Complicated appendicitis: used open approach in place of laparoscopy  
 Appendix mass: non-operative treatment as opposed to appendicectomy  
 Appendix mass: no offer of interval appendicectomy as opposed to routine offering of interval appendicectomy  
(Tick all that apply)

In what way were these GENERAL ASPECTS OF MANAGEMENT different?

- Any appendicitis: routine imaging for all to be certain of diagnosis  
 Any appendicitis: CT instead of US (including use of chest CT or to protect staff)  
 Any appendicitis: transfer of a child to our hospital for treatment when that treatment would usually be provided at local hospital  
(Tick all that apply)

Was this different management brought about:

- as an active decision by you / your department  
 as a passive decision due to different resource availability (e.g. you could not get a child to surgery and they got better on antibiotics)  
 on the instruction of your department / institution / NHSE  
 instigated by the parents  
(Tick all that apply)

**Question 2**

Thinking ahead and given what you currently know about the likely effect the coronavirus pandemic will have, please indicate if you anticipate that you will manage children with acute appendicitis differently compared to your usual practice DURING the pandemic (for example you may be considering different thresholds for imaging, or the use of non-operative treatment in place of appendicectomy).

- Yes - differently
- No - usual practice

If yes, in what way do you currently anticipate there will be differences for children with SIMPLE APPENDICITIS?

Please only tick the box if you anticipate your management will be different to your usual practice for the specific clinical situation listed.

- Simple appendicitis: I will actively offer non-operative treatment to all children with simple appendicitis
- Simple appendicitis: I will consider non-operative treatment for children with simple appendicitis at parental request
- Simple appendicitis: I will actively perform open (as opposed to laparoscopic) appendicectomy in children with simple appendicitis  
(Tick all that apply)

If yes, in what way do you currently anticipate there will be differences for children with COMPLICATED APPENDICITIS?

Please only tick the box if you anticipate your management will be different to your usual practice for the specific clinical situation listed.

- Complicated appendicitis: I will actively offer non-operative treatment to children with complicated appendicitis
- Complicated appendicitis: I will consider non-operative treatment to children with complicated appendicitis at parental request
- Complicated appendicitis: I will actively perform open (as opposed to laparoscopic) appendicectomy in children with complicated appendicitis
- Complicated appendicitis: I will actively pursue a shorter than usual course of intravenous antibiotics in children with complicated appendicitis
- Appendix mass: I will actively offer non-operative treatment to children with appendix mass
- Appendix mass: I will consider non-operative treatment to children with appendix mass at parental request
- Appendix mass: I will not offer routine interval appendicectomy in children who have had successful non-operative treatment of appendix mass  
(Tick all that apply)

1 If yes, in what way do you currently anticipate there  
2 will be differences in the GENERAL MANAGEMENT of  
3 children with appendicitis?  
4

5 Please only tick the box if you anticipate your  
6 management will be different to your usual practice  
7 for the specific clinical situation listed.  
8

- Any appendicitis: Routine imaging for all cases of suspected appendicitis to be certain of diagnosis
  - Any appendicitis: CT scan instead of US for diagnosis of appendicitis
  - Any appendicitis: More frequent use of imaging to guide management (e.g. select cases for non-operative treatment / reduce negative appendicectomy rate)
  - Any appendicitis: consultant review for all cases prior to considering surgery
  - Any appendicitis: we will likely be sending children with appendicitis to another hospital for treatment
  - Any appendicitis: we will likely be treating children at my hospital who would usually be treated somewhere else
- (Tick all that apply)

Confidential: For Review Only

9  
10  
11  
12  
13  
14  
15  
16  
17  
18  
19  
20  
21  
22  
23  
24  
25  
26  
27  
28  
29  
30  
31  
32  
33  
34  
35  
36  
37  
38  
39  
40  
41  
42  
43  
44  
45  
46  
47  
48  
49  
50  
51  
52  
53  
54  
55  
56  
57  
58  
59  
60



1  
2  
3  
4  
5  
6  
7  
8  
9  
10  
11  
12  
13  
14  
15  
16  
17  
18  
19  
20  
21  
22  
23  
24  
25  
26  
27  
28  
29  
30  
31  
32  
33  
34  
35  
36  
37  
38  
39  
40  
41  
42  
43  
44  
45  
46  
47  
48  
49  
50  
51  
52  
53  
54  
55  
56  
57  
58  
59  
60

**Question 3**

Thus far during this pandemic, has your department or your institution made any decisions or placed any restrictions on you that you feel will influence how you manage children with acute appendicitis that are not included in responses to the questions above

Yes  
 No

Please describe

\_\_\_\_\_

Confidential: For Review Only

1  
2  
3  
4  
5  
6  
7  
8  
9  
10  
11  
12  
13  
14  
15  
16  
17  
18  
19  
20  
21  
22  
23  
24  
25  
26  
27  
28  
29  
30  
31  
32  
33  
34  
35  
36  
37  
38  
39  
40  
41  
42  
43  
44  
45  
46  
47  
48  
49  
50  
51  
52  
53  
54  
55  
56  
57  
58  
59  
60

**Question 4**

Do you have any suggestions for practice change during the pandemic in relation to acute appendicitis that you wish to share? These may be useful to help other institutions manage children with appendicitis.

---

Any suggestions will be treated anonymously.

Confidential: For Review Only

1 **Last page**

2  
3 In order to ensure that we send you a copy of the  
4 rapid summary findings of this survey, please  
5 provide your email address.

(Whilst this is optional it would be really great  
if as many people as possible would be willing to  
complete a survey later in the year so we can  
maximise the opportunities for learning.)

6 We will also send you a link to the survey at the end  
7 of the pandemic so we can understand the impact  
8 better.  
9

10  
11  
12  
13 Please enter the name of the institution at which you  
14 work (this is just so we can identify responses from  
15 the same centre) \_\_\_\_\_

16  
17 Are you a

- General Surgeon
- Specialist Paediatric Surgeon

18  
19  
20 If you wish to receive acknowledgement of your  
21 participation in this national survey please provide  
22 your name. \_\_\_\_\_  
23  
24  
25  
26  
27  
28  
29  
30  
31  
32  
33  
34  
35  
36  
37  
38  
39  
40  
41  
42  
43  
44  
45  
46  
47  
48  
49  
50  
51  
52  
53  
54  
55  
56  
57  
58  
59  
60
